# Supplementary material
Source: PubMed Central journal article supplement (PMC4681511)
Supplement: NIHMS743311-supplement-Supporting_Information.pdf [file NIHMS743311-supplement-Supporting_Information.pdf]

SUPPORTING INFORMATION

**Combining Mass Spectrometric Metabolic Profiling with Genomic Analysis: A Powerful Approach for Discovering Natural Products in Cyanobacteria**

*Karin Kleigrewé<sup>†</sup>, Jehad Almaliti<sup>†</sup>, Isaac Yuheng Tian<sup>†,‡</sup>, Robin B. Kinnel<sup>§</sup>, Anton Korobeynikov<sup>⊥||∇</sup>, Emily A. Monroe<sup>°</sup>, Brendan M. Duggan<sup>□</sup>, Vincenzo Di Marzo<sup>-</sup>, David H. Sherman<sup>◇</sup>, Pieter C. Dorrestein<sup>□</sup>, Lena Gerwick<sup>†</sup> and William H. Gerwick<sup>\*†□</sup>*

<sup>†</sup>Center for Marine Biotechnology and Biomedicine, Scripps Institution of Oceanography, University of California San Diego, USA;

<sup>‡</sup>University of California Berkeley, USA; <sup>§</sup>Hamilton College, Clinton, NY, USA;

<sup>⊥</sup>Faculty of Mathematics and Mechanics, Saint Petersburg State University, Russia;

<sup>||</sup>Center for Algorithmic Biotechnology, Saint Petersburg State University, Russia;

<sup>∇</sup>Algorithmic Biology Laboratory, Saint Petersburg Academic University, Russia;

<sup>°</sup>Department of Biology, William Paterson University of New Jersey, USA;

<sup>-</sup>Institute of Biomolecular Chemistry, National Research Council, Pozzuoli, Italy;

<sup>◇</sup>Life Sciences Institute, University of Michigan, Ann Arbor, Michigan;

<sup>□</sup>Skaggs School of Pharmacy and Pharmaceutical Sciences, University of California San Diego, USA

|                                                                                                                                                                                                                                                                                                                                                                                                                    |   |
|--------------------------------------------------------------------------------------------------------------------------------------------------------------------------------------------------------------------------------------------------------------------------------------------------------------------------------------------------------------------------------------------------------------------|---|
| Table 1: Comparison of the residues in the amino acid binding pockets of the adenylation domains of ColG with the consensus sequence. The number represent the positions of the amino acids of GrsA. <sup>[1]</sup> Red marks variable constituents within a codon. ....                                                                                                                                           | 2 |
| Table 2: Multiple sequence alignment of N-methyltransferases. An * (asterisk) indicates positions which have a single, fully conserved residue. A : (colon) indicates conservation between groups of strongly similar properties - scoring > 0.5 in the Gonnet PAM 250 matrix. A . (period) indicates conservation between groups of weakly similar properties - scoring =< 0.5 in the Gonnet PAM 250 matrix. .... | 3 |
| Table 3: Multiple sequence alignment of O-methyltransferases. An * (asterisk) indicates positions which have a single, fully conserved residue. A : (colon) indicates conservation between groups of strongly similar properties - scoring > 0.5 in the Gonnet PAM 250 matrix. A . (period) indicates conservation between groups of weakly similar properties - scoring =< 0.5 in the Gonnet PAM 250 matrix. .... | 4 |

|                                                                                                                                                                                                                                                                                                              |    |
|--------------------------------------------------------------------------------------------------------------------------------------------------------------------------------------------------------------------------------------------------------------------------------------------------------------|----|
| Figure S 1: Stacked spectra of <sup>1</sup> H-NMR of Columbamide A, B and C (recorded on a 600 MHz NMR with cryoplatfrom in CDCl <sub>3</sub> ).....                                                                                                                                                         | 6  |
| Figure S 2: <sup>1</sup> H NMR (600 MHz, CDCl <sub>3</sub> ) spectrum of columbamide A. ....                                                                                                                                                                                                                 | 7  |
| Figure S 3: <sup>13</sup> C NMR (125 MHz, CDCl <sub>3</sub> ) spectrum of columbamide A. ....                                                                                                                                                                                                                | 8  |
| Figure S 4: COSY ( <sup>1</sup> H 600 MHz, CDCl <sub>3</sub> ) spectrum of columbamide A.....                                                                                                                                                                                                                | 9  |
| Figure S 5: HSQC ( <sup>1</sup> H 600 MHz, CDCl <sub>3</sub> ) spectrum of columbamide A. ....                                                                                                                                                                                                               | 10 |
| Figure S 6: HMBC ( <sup>1</sup> H 600 MHz, CDCl <sub>3</sub> ) spectrum of columbamide A. ....                                                                                                                                                                                                               | 11 |
| Figure S 7: H2BC ( <sup>1</sup> H 600 MHz, CDCl <sub>3</sub> ) spectrum of columbamide A .....                                                                                                                                                                                                               | 12 |
| Figure S 8: TOCSY ( <sup>1</sup> H 600 MHz, CDCl <sub>3</sub> ) spectrum of columbamide A.....                                                                                                                                                                                                               | 13 |
| Figure S 9: NOESY ( <sup>1</sup> H 600 MHz, CDCl <sub>3</sub> ) spectrum of columbamide A. ....                                                                                                                                                                                                              | 14 |
| Figure S 10: Marfey's analysis of the dimethylated-serinol in columbamide A. <b>A</b> shows the extracted ion chromatogram of the D-Marfey's standard and <b>B</b> shows the L-Marfey's standard. <b>C</b> depicts the extracted ion chromatogram of hydrolyzed and Marfey's derivatized columbamide A. .... | 15 |
| Figure S 11: <sup>1</sup> H NMR (600 MHz, CDCl <sub>3</sub> ) spectrum of columbamide B. ....                                                                                                                                                                                                                | 16 |
| Figure S 12: <sup>13</sup> C NMR (125 MHz, CDCl <sub>3</sub> ) spectrum of columbamide B. ....                                                                                                                                                                                                               | 17 |
| Figure S 13: COSY ( <sup>1</sup> H 600 MHz, CDCl <sub>3</sub> ) spectrum of columbamide B.....                                                                                                                                                                                                               | 18 |
| Figure S 14: HSQC ( <sup>1</sup> H 600 MHz, CDCl <sub>3</sub> ) spectrum of columbamide B. ....                                                                                                                                                                                                              | 19 |
| Figure S 15: HMBC ( <sup>1</sup> H 600 MHz, CDCl <sub>3</sub> ) spectrum of columbamide B. ....                                                                                                                                                                                                              | 20 |
| Figure S 16: TOCSY ( <sup>1</sup> H 600 MHz, CDCl <sub>3</sub> ) spectrum of columbamide B.....                                                                                                                                                                                                              | 21 |
| Figure S 17: NOESY ( <sup>1</sup> H 600 MHz, CDCl <sub>3</sub> ) spectrum of columbamide B. ....                                                                                                                                                                                                             | 22 |
| Figure S 18: <sup>1</sup> H NMR (600 MHz, CDCl <sub>3</sub> ) spectrum of columbamide C. ....                                                                                                                                                                                                                | 23 |
| Figure S 19: COSY ( <sup>1</sup> H 600 MHz, CDCl <sub>3</sub> ) spectrum of columbamide C.....                                                                                                                                                                                                               | 24 |
| Figure S 20: HSQC ( <sup>1</sup> H 600 MHz, CDCl <sub>3</sub> ) spectrum of columbamide C. ....                                                                                                                                                                                                              | 25 |
| Figure S 21: HMBC ( <sup>1</sup> H 600 MHz, CDCl <sub>3</sub> ) spectrum of columbamide C. ....                                                                                                                                                                                                              | 26 |
| Figure S 22: Measurement of the coupling constant using HSQC and measuring the <sup>3</sup> J <sub>HH</sub> coupling constant from the <sup>13</sup> C satellites of columbamide A, methyl elaidate and methyl oleate.....                                                                                   | 27 |

Table 1: Comparison of the residues in the amino acid binding pockets of the adenylation domains of ColG with the consensus sequence. The number represent the positions of the amino acids of GrsA.<sup>[1]</sup> The red letters indicate conservative substitutions in ColG and NosA relative to the Stachelhaus consensus sequence.

| Position           | 235 | 236 | 239 | 278 | 299 | 301 | 322 | 330 |
|--------------------|-----|-----|-----|-----|-----|-----|-----|-----|
| Consensus<br>(Ser) | D   | V   | W   | H   | L   | S   | L   | I   |
| ColG               | D   | V   | W   | H   | I   | S   | L   | I   |
| NosA               | D   | V   | W   | H   | I   | S   | L   | I   |

Table 2: Multiple sequence alignment of N-methyltransferases. An \* (asterisk) indicates positions which have a single, fully conserved residue. A : (colon) indicates conservation between groups of strongly similar properties - scoring > 0.5 in the Gonnet PAM 250 matrix. A . (period) indicates conservation between groups of weakly similar properties - scoring <= 0.5 in the Gonnet PAM 250 matrix. The sequence information was obtained from <http://www.nii.ac.in/~pkfdb/sbspks/master.html>.<sup>[2]</sup>

CLUSTAL FORMAT: MUSCLE (3.7) multiple sequence alignment

```

barba006_N      LSNYDKQPIPEAQMRDWAEDIVTQVLANKPNSVWEVCGGTGMLLFKFIAPHTRAYYGTDIS
ColG_NM         -----NQPIPVQMRWAGDIVTQVLAQKPESVWEIGCGTGMLLFQIAPQTQNYGYTDIS
tubul002_N      ---TGQPVAVEEMRDWLRHRVERVRGLRPRRILEVGCCTGLMLFALLPHCERYVGTDFD
nodul005_N      ----GLPIAQEQMGQWLNSTVSRILLGKPKRVLEIGCGSGLLLFRVAPHCQEYWGADYS
anaba002_N      NSSYTGKAIPDSEMREWVESTVSRILLGKPKRVLEIGCGSGLLLFRVAPHCQEYWGADYS
tubul001_N      ----GEPLPPEQMRREWVETTVRMLMELVPRRVLELGCGLLLRRLAPRCESYWGTELS
thaxt001_N      --SYGGRPI--EGMREWREQTVRQIRELAPRRVLEIGCGSGLLLSQLAGDCEYWGTDIS
prist002_M      -----
thaxt002_N      NSTYDGEPIPVPMQAWRDATVDSIRALRPRRVLEIGVGTGLLLSRLAGDCEAYWATDFS
actin003_T      -----GVGTGLLLSRLAPHCEEYWGTDIFS
actin003_r      -----LAPECEEYWGTDLS
compl003_M      -----

```

```

barba006_N      EVSLKYIQTQIAQQPD-KYAHVTLAQKAAEEMADIADNSFDVLLSSIVQYFPPSVEYLLQ
ColG_NM         NVSLEYIKQQIEQEPD-KYGDVSLAQKRADNMADIADNSFDVLLSSIVQYFPPSVEYLLQ
tubul002_N      PAALDYVRRYL--PPE-HPGRVELLHRTADEWSGVAAGSFDVLLNSVVOYFPPSVEYLRQ
nodul005_N      DTAIRYVETQMOKVGS-AWSQVQLYNQPAHNLQGFEPKTFDAVIINSVVOYFPPSIDYLV
anaba002_N      SATIRNLERLCG-EIQ-GLENVRLHKTADNFEGIPQGAFDVTVVNSVVOYFPPSVDYLLQ
tubul001_N      PVAVERLREQLQTGGSPLAQRVRLMAQPADDFSGLPEAGFDTVILNSVTQLFPPSVDYLLR
thaxt001_N      GALIERLRGQVAERPG-LADRVLHLQLSAHELGLSLPSGGFDTVVLSVVIQYFPPSGDYLF
prist002_M      -----VAQYFPDARYLAG
thaxt002_N      AEVIETLGKKVDVDPV-LREKVHLLHGPADHLPGLPEGYFDTVVLSVVIQYFPPSADYLV
actin003_T      PTVIADLRGHVEADPE-LAARVQLRTQPAHDFDQLPHGHFDTVVLSVVOYFPPNAGYLEQ
actin003_r      PTVIEALSRRHVDADPE-LARRVTLRAGAAHEHEGLPVGHFDTVVLSVVOYFPPNADYLAQ
compl003_M      -----AADETDLGPEGHFDTVVLSVVOYFPPNADYLRG
                                : * * . **

```

```

barba006_N      VINSNIRVVKPGGMIFLGDIRSLPLMRAFHTSVQLHKAP-PSLSVQQLKQGIYRLMQOET
ColG_NM         VIEESIRVVKPGGMIVLGDIRSFPLMRAFHSVQLY-----
tubul002_N      VLARCVEAVEDEGGFVFGDVRSLPLLESFHASVELERAA-PSMPLEAWRERVRAVLEDN
nodul005_N      VLEGAVEMVAPGGWIFVGDVRSPLPLPAFHADIVLHQSS-HDLPTADWQVRVQKNLQEDQ
anaba002_N      VLEGAMTAIASQKIFVGDVRSPLPLLPYHAAVQLARAE-SDKTVEQWQQVHQTVAAEE
tubul001_N      VVEGALRVLPGGTLFVIGDVQNLRLFELFHASVALEQAS-ADLEAPALLARTRQRMILLDE
thaxt001_N      LLREVSRLVPGGAVFLGDVRLRLRLRTFHAGGLLAAAT-HTDTPQTVCAIIDRAMAQEK
prist002_M      ILHRAAELLAPGCTIFLGD-----
thaxt002_N      VLREAARLLAPGGRVFGDIRHLRLLRPLRSVRLRSATRREASASAVRAAVEQDLVDEK
actin003_T      VLDHALRIILAPGGTVFI-----
actin003_r      VIEQALRLLAPGCAVFI-----
compl003_M      VLEWALRLVAPGCAVFE-----
                                ::      : * ::

```

```

barba006_N      ELLVSPPELFAVKDTYPEITHVQIRLQRGSEHNELNKYRYSVLLHIQAKPT-----
ColG_NM         -----
tubul002_N      ELVVDPALFVALAHQHPVSHVDIELTRGTHPNEMARFRYNAVLHIGPRT-----
nodul005_N      ELVIDPAFFTALMQHLPQIRRVQIQLKGRDRNELTRFRYDVLHIETEVVPIESQD
anaba002_N      ELLIDPRFFIALQQRFPQITWVEIQPKRGHAQNELTQFRYDVTLHLVLMWKGSSLVK
tubul001_N      RLYVDPDFFAALATHFPQLGAVRLLHLKRGSGRN-----
thaxt001_N      ELLVDPEFFTTAVGALPGMTLESCTLKRG-----
prist002_M      -----
thaxt002_N      ELLLDPAFFAAVPRWIPQLRGVRTAVQRGTHHNELTRYRYDAVLIKEPVETGTAAPDA
actin003_T      -----
actin003_r      -----
compl003_M      -----

```

Table 3: Multiple sequence alignment of O-methyltransferases. An \* (asterisk) indicates positions which have a single, fully conserved residue. A : (colon) indicates conservation between groups of strongly similar properties - scoring > 0.5 in the Gonnet PAM 250 matrix. A . (period) indicates conservation between groups of weakly similar properties - scoring <= 0.5 in the Gonnet PAM 250 matrix. The sequence information was obtained from <http://www.nii.ac.in/~pkfdb/sbspks/master.html>.<sup>[2]</sup>

CLUSTAL FORMAT: MUSCLE (3.7) multiple sequence alignment

```

ColG_OM          -----DVGANIGMFSL--FASQQVKDL----EIFAFE
KtzH_OM          -----VVDVGGHVGLFSL--FVKTRRPDC----RIYAFE
stigm_004        -----LNEKQPGFSLRVA--YGLDPSEER----MRLLLH
stigm_005        -----WGVFQEI VPGFSWIRTV--FRPSEPEG----RERLAV
melit004_0       -----VYLTFGIMRRPVPGFSWLLNV--YGMSETPEH----KDVLLD
barba005_0       -----DYARFAPFSEVVPDFSWLEVI--LNPDQHEPQ----TSLSLQ
melit005_0       -----WISL---YRPEPQE QSYRAYDYDIALK
onnam001_0       -----SSMTLVEGIYKNNLVSDYFNQVLGDV-----
onnam002_0       -----EKIEGLYKNNHVCDYFNQVVAEV-----
peder001_0       -----EKIEGLYKNNLICDYFNDVVAGV-----
nodul002_0       -----QVSELYTGIARKDKDLNPNIPQ--WLNFG--YWQEETTYN-----G
onnam005_0       --MSRSHLEEIAELYDS---AEGHVGNLIFDGQ--VHWG--YWDERNADA-----SLAE
peder004_0       MQTAIADVEKVATLYDS---AEGQVGPILFGGH--MHWG--YWDEVTGEG-----NFAN
anaba003_0       -----FDSLIFNT--STRDYGEKEFFNVG--YWHSDTQNQ-----HE
peder003_0       -----HINQHYDHTFFSE--GLTSLLDVGS DYRNIG--YWDETTTTQ-----HE
onnam003_0       -----HYDRFFYEQHGVERLIREETDFKNLG--YWDDTTLDL-----NA
onnam004_0       --ARIPLTDEINSFYDHQFYSQDSIFGLLLGDTKFRNIG--YWDETTDPQ-----NA

```

```

ColG_OM          PIPPVFKVLEMNTELYIS-KVKLFECGLSNQTRMETFTYYP-ENSVVSGLYADQNQE QEM
KtzH_OM          PIPELAEMFRINAELHDI-DAVVTNCGVCATAGTARFTYYP-DMSMLSGRFADEREERM
stigm_004        SQRALRNVLDSVDFSRAKSVWDFGCGYASDIIA-LGERHS-HLKLHGHTLSSEQAELGL
stigm_005        AQRELRRVLFRAVDLSAIKNVMDFGCGHGSDLII-LGEQNE-HLKL DGYTISGKQAEVCK
melit004_0       GQRGLRSVLFGGVWRVESVRKVLDFGCGYASDLLS-LARRHP-HLKLHG YTISAEQAAVDA
barba005_0       AQAEMKAVLFRGIDFSSIKKVM DIGCGYSHDLID-LATNHV-HLQLDGYNISP EQVKAGE
melit005_0       ANQEMARILYRGVDFSTRTRVLDIGCGHAADLVD-LAR AHP-HLELHG CNISPDQIEVGR
onnam001_0       ----LVAFMTRGHEEPV-RILEIGAGTGGTTATLLEKLRPFQE QIAAYCYTDVSKAFLF
onnam002_0       -VQTYIHQRLAVNPKATI-RILEIGAGTGGTSMVLPALRPFQDHIDTYSYTDLSKSF FI
peder001_0       -AQAYIQRRLENEPNAEI-RLLEV GAGTGGTSTVLPQLNLWRAFI AEYATDLSKSF FN
nodul002_0       ACAALARKLGEVAELSPGEQVLDVGFGEAEQDIL-WMRENN-LGAI TGINTELVQVKIAQ
onnam005_0       GADRLTQIMIDKTTIEKQKFCDLGCGWGPAVA-LAKAKG--CYIDGITCSGQQQNAV
peder004_0       AAERLAQIMIAKAPIKAGQKFIDMGGCFGESALK-LAKAKG--CFVDGITISKEQQLSAI
anaba003_0       ACFNLMEKLLLEFIPRKQG-NILDVGCGLGATTSH-LLNYYS-PADVVGINISRKQIERSI
peder003_0       ASERLQDALLDFIPEKSG-RILDAACGMCAS TRH-LLEYYP-ADNIWAINISEKQIEATR
onnam003_0       AAERLFKTLMAMIPKKS G-RILDAGCGTGATR R-LLESYP-PENVWAINISAKQIETTK
onnam004_0       AAEKLDMLLEMIPEKTG-RILDVACGMCAS TRR-LAELYS-PENVWAINISEKQIESTR

```

```

ColG_OM          -----MKTFLSNKQKETGE-----KSKLSSQELEQVSSYMFQTQQQVNCQLRT
KtzH_OM          -----LERVLRNERLADLD-----DGVLDELLAERL-----RGQQVDVELRT
stigm_004        RKIEARGLGGRVQVLRDSSKDAPL-----ESAYDVILGF EVATHIKEKRSLEQNLSH
stigm_005        QRVTRTRGLQNRIRIFQRDSAKDDFP-----GMYDLVLGF EVAGLIPDKDALESNIDRH
melit004_0       RRVRERGFEDRIRVFARDSAKDAFP-----DRYDVAFGFEVATHIADKDALESNLRH
barba005_0       QKIQGLGYSDRIYLYNRDSAKQPLP-----DTYDLIFSCQVIH HIKRKEDEVLNISQH
melit005_0       QRIRALGLDGRVLLHYQDSSRDQFP-----STYDLVIAYQVIH HIRAKSDLEFANISRS
onnam001_0       HAEEHFAPHEPFIGTAIFDVEQPLANGVIK-PADYDIVIATNVLHATKNICETLRNAKAA
onnam002_0       HAKERYGTAYPFVEYKILNIEKPLAQDVTLLGSYDIAIATNVLHATKSMRNTLRNVKAA
peder001_0       HARLRYGTDYPITYRLLNIEEPLIQDIE-IGTYDIL IATNVLHATRNMNRNTERNAKAA
nodul002_0       ERVARAGLEERINLQVGSATKIPFA-----ENSFDKVTALECAFHFNTREDFEAEAFRV
onnam005_0       KKAQELGMDDLNF IHGDALNMPCK-----DQTYDGGWFFESIFHMGHREALL-EANRI
peder004_0       TRAEAEQLQERVRFIHGSALNIPCE-----DQSYDGGWFFESIFHMGHRKA-LHEAARV
anaba003_0       VNAPG-----CKFICMDAVQMEFE-----DDFFDNII CVEAAFYFNTREKFEKEAMRV
peder003_0       RNVPG-----CHAQVMNAVDSLFE-----EGFFDNILCIEAAFHFETRQKFE EEARRI
onnam003_0       QNVKG-----CHAIVMNAVDMTFE-----DNFFDTVLSIEAAMHFETR RKFEEESFRV
onnam004_0       ENAKG-----CHVQVMSAVEMTFD-----NDFFDTIMCIEAAFHFETR RKFEDDSLRV

```

ColG\_OM L-----SEVIREQGVEQIDLLKIDVEKSELEVLE-----GIESEDWSKIKQ----I  
KtzH\_OM L-----SDLIREQGIDRIDLLKIDAESLDDVVR-----GIEPEHWAIV-----  
stigm\_004 LREGGFMLLADFIANS-GSGVDVQDIASYNV-----TPSQWVELLSEHGLR  
stigm\_005 LTNGGLLIMADFVANT-LSPIEVQETSTFSS-----TREQWNKLFSSNHLR  
melit004\_0 LNNGGFLLLADFIAAG-VSAINIETASYNS-----SAEEWADVLSRHNFR  
barba005\_0 LNDSGFFVAAEIIISNLPLTPIDDAKSTAYYV-----TRSKWAQLLARNNLK  
melit005\_0 MKPGGLLIMAE TMSNM-VSPIEHPESTTQFV-----PVGEWAELLARNHLR  
onnam001\_0 LKQHGLMLLNELSDQSLFAHLTFGLLEGWWRHEDASIRIPGSPGLFPEAWQSVLEREGFT  
onnam002\_0 LARNGIAIINEMTTKTVFATVFLFGLIDGWSLSEDTVLRIPGSPGLYAETWHQLLEEGFR  
peder001\_0 LRNGILILNEISDKTIFASVLFGLIDGWSLAEDEHWRI PGSPGLFAENWQALLLQEGFD  
nodul002\_0 LRPGGKLLALADCL-----PRVGRDINFWLRVNSKKMCIPFVNQYDRNTYVEKLLKQGFV  
onnam005\_0 LKLGATLLITDAYLLS-TASEDFKEHTSRRVHSRFM-----PKDIYPGVLEETGFE  
peder004\_0 LKPGSTLLLTDLPLLP-ESTEAFKEF-VWEHIHSRFV-----SREDYPELLAEAEFE  
anaba003\_0 LKPGGNLILADLIFDT---TKYFGDLIVPENIVKDK-----DIEDYKRLYQQAGFQ  
peder003\_0 LRPGGRLVLSDFVLFSS---SERLEQYPIFPSAINHLN-----DTEEYRLLKDTGFS  
onnam003\_0 LKQDGCLVLSDFLFTS---QERLEQNDYFGGVSNIHIE---TIEDYQQLMEEIGFR  
onnam004\_0 LKQGGRLVLSDFLFTS---KERLEQSSIFPSPENHID-----TLEEYRQVMEEGAGFR  
: : :

ColG\_OM VVEVHDINGRL-----AAVEELKAQGYQL-----  
KtzH\_OM -----RQVVAEVH-----  
stigm\_004 LVECVDVSQEVANF-LFDADFDANLTQLETSVGI SAIEKRNYQAMRNFGAALERKILSYV  
stigm\_005 LVDAVDVSNEVANC-LHNPDYAAQFEALCKELKLDVETQRSFGSYENVYKALRGLISYV  
melit004\_0 LVEGVDISREASLF-LEDPSFDQNLERVTERFKLNELV-----  
barba005\_0 VVEGVDA SLGIANY-LYDPNF-----  
melit005\_0 VVECVDATQEI-----ANFLHDAE-----  
onnam001\_0 SVCFP-----ARAAHQLGQQIIVAESN-----  
onnam002\_0 SILFP-----AHPARELGQQIVVSESN-----  
peder001\_0 KVSFP-----AQVAHDLGQQIIVAQTN-----  
nodul002\_0 NIQAIPIGEYV--WPAVVHYFAQVQGQISKHDLVINLQKDNPGLEAWSRDRGWFMAFDDY  
onnam005\_0 AVEVLDVTQYV--MRPLAQKLDACVAYREEILKLVPE---EAIDDWLWGFEDFCANLGY  
peder004\_0 LIEIDDITDNVMPW--LEPKLKEAIELHRPQVEAII PNDEKAIDDWLYLFEYMSENLGY  
anaba003\_0 PIEFVEATEVC--W---KIHYRDLKSSIIIEEFNTGKIDEETYNFNVAIDALLDSSSIDY  
peder003\_0 QVEIEDVSDEV--W---GAHFYIYAVKRVHEAFYKGE-----  
onnam003\_0 NVVVKDVSKAV--W---GSNFLYNINKLHKEFYHGR-----  
onnam004\_0 NIVVKDVSKNV--W---EAHFYLVINKIHEGFYHGR-----

ColG\_OM -----  
KtzH\_OM -----  
stigm\_004 LFIAQKDSHVRSTYLRHINQKWEAPAPYAA  
stigm\_005 LFHVQKDRFSRSDLFHLNAKQFEQLTP---  
melit004\_0 -----  
barba005\_0 -----  
melit005\_0 -----  
onnam001\_0 -----  
onnam002\_0 -----  
peder001\_0 -----  
nodul002\_0 ILFSGEKP-----  
onnam005\_0 LLVTARKK-----  
peder004\_0 MIVMAKKL-----  
anaba003\_0 LLVSVKPP-----  
peder003\_0 -----  
onnam003\_0 -----  
onnam004\_0 -----

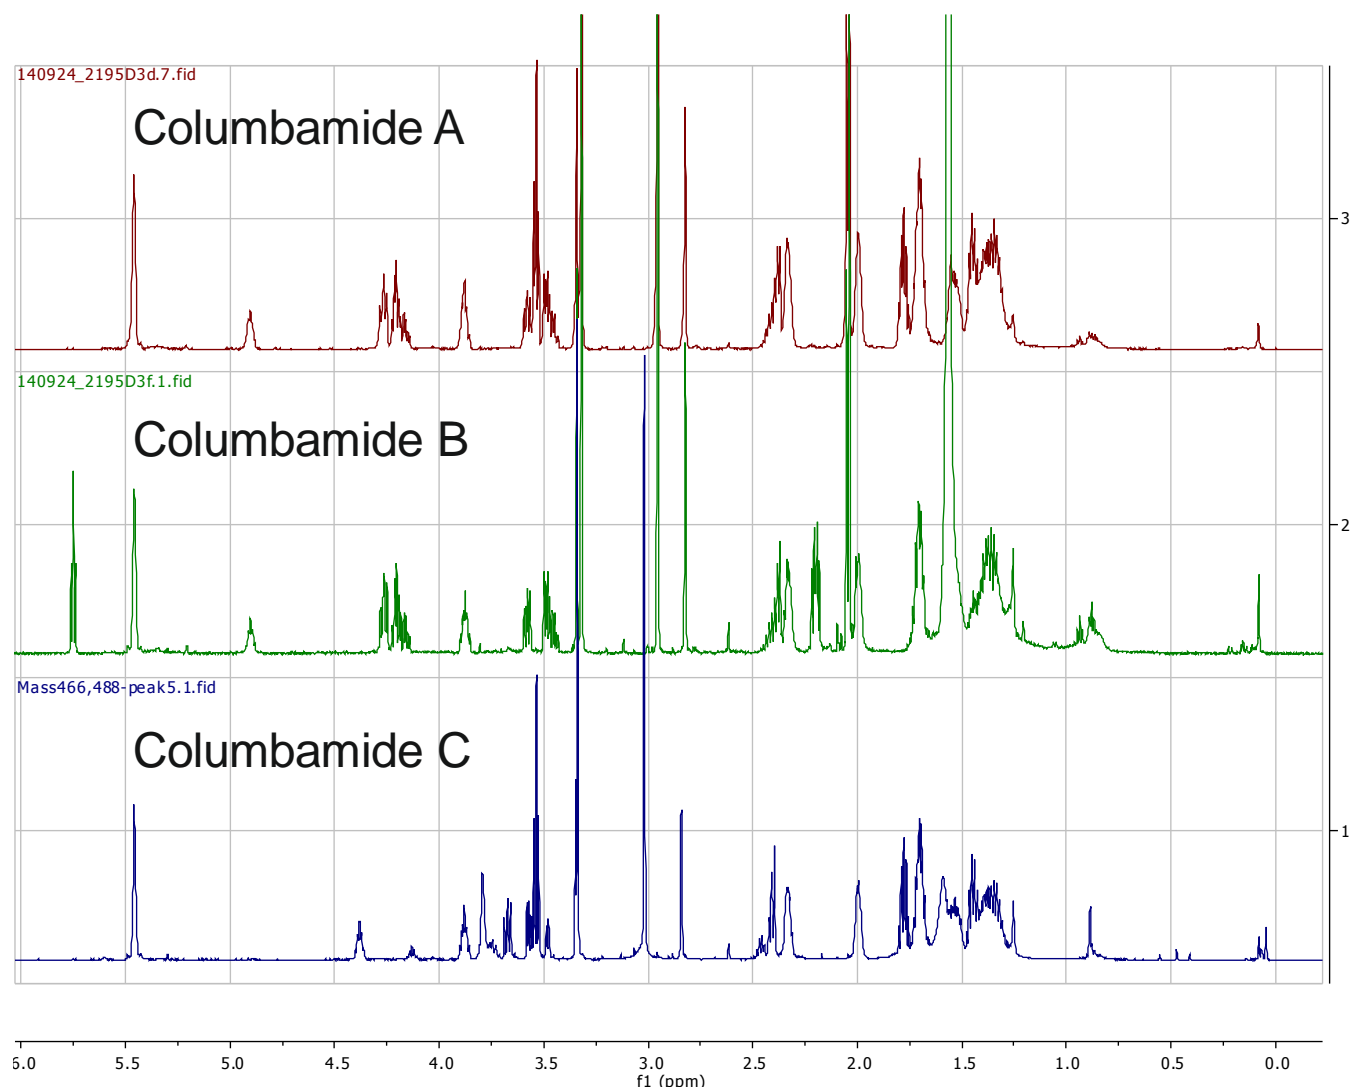

Figure S 1: Stacked spectra of  $^1\text{H}$ -NMR of Columbamide A, B and C (recorded on a 600 MHz NMR with cryoplatfrom in  $\text{CDCl}_3$ ).

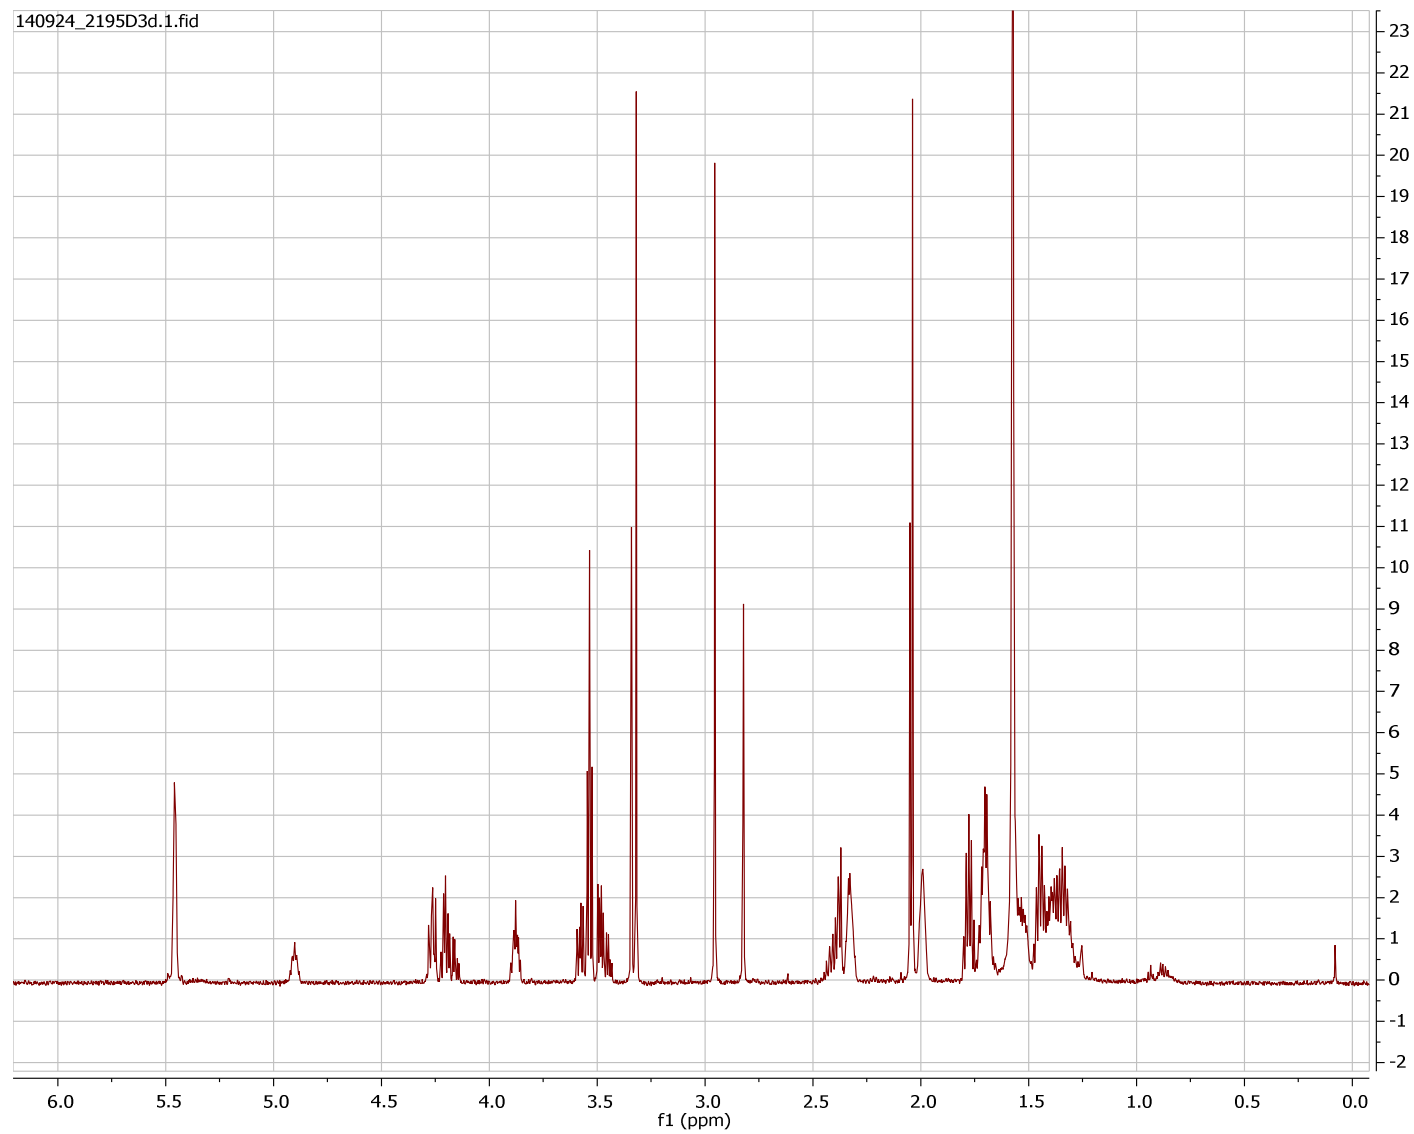

Figure S 2:  $^1\text{H}$  NMR (600 MHz,  $\text{CDCl}_3$ ) spectrum of columbamide A.

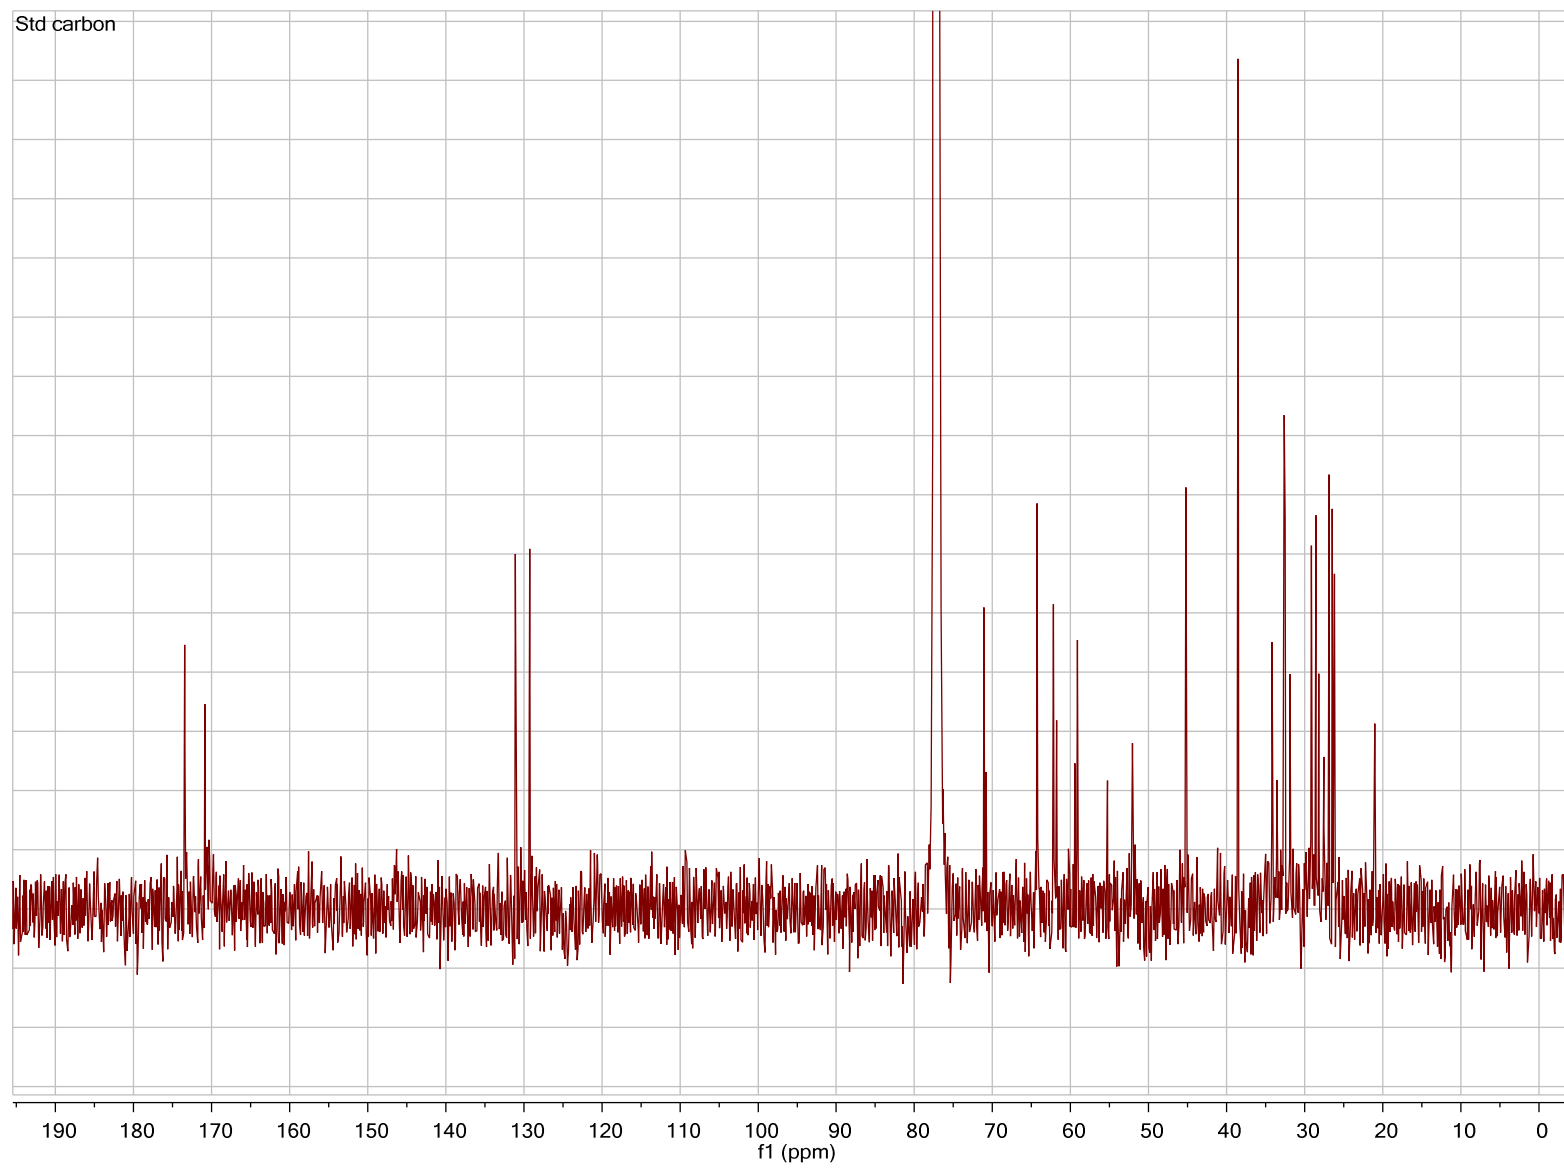

Figure S 3:  $^{13}\text{C}$  NMR (125 MHz,  $\text{CDCl}_3$ ) spectrum of columbamide A.



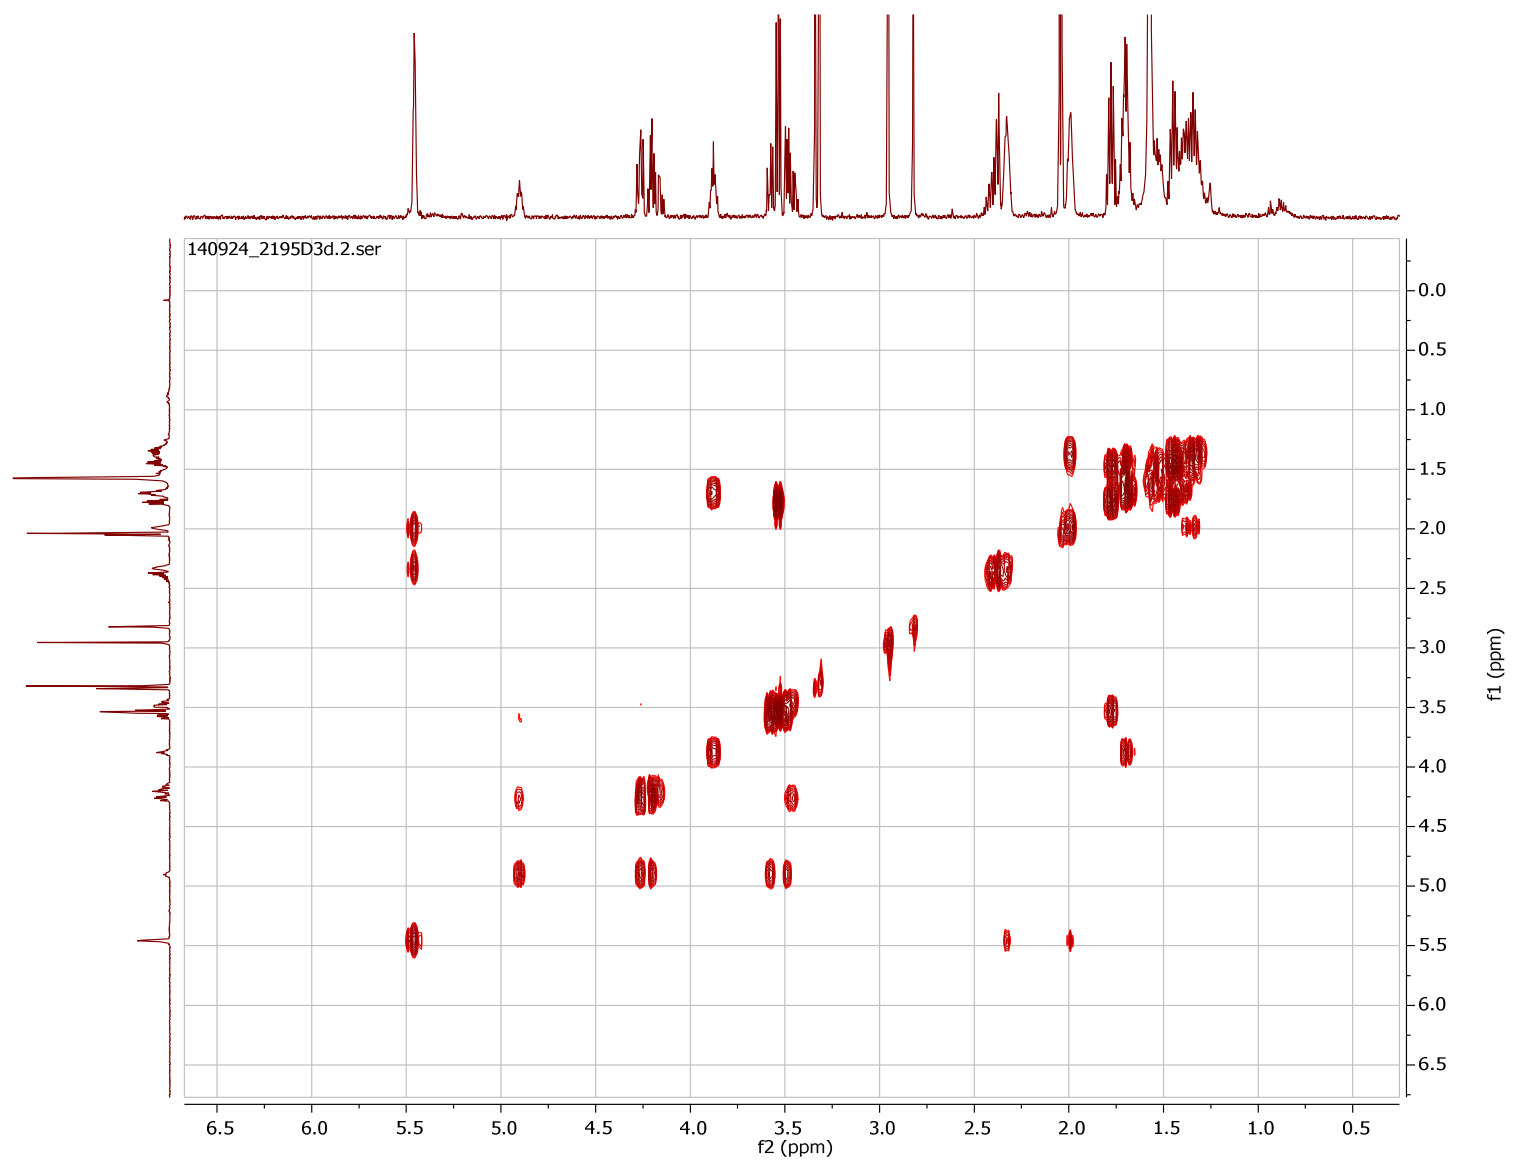

Figure S 4: COSY (<sup>1</sup>H 600 MHz, CDCl<sub>3</sub>) spectrum of columbamide A.

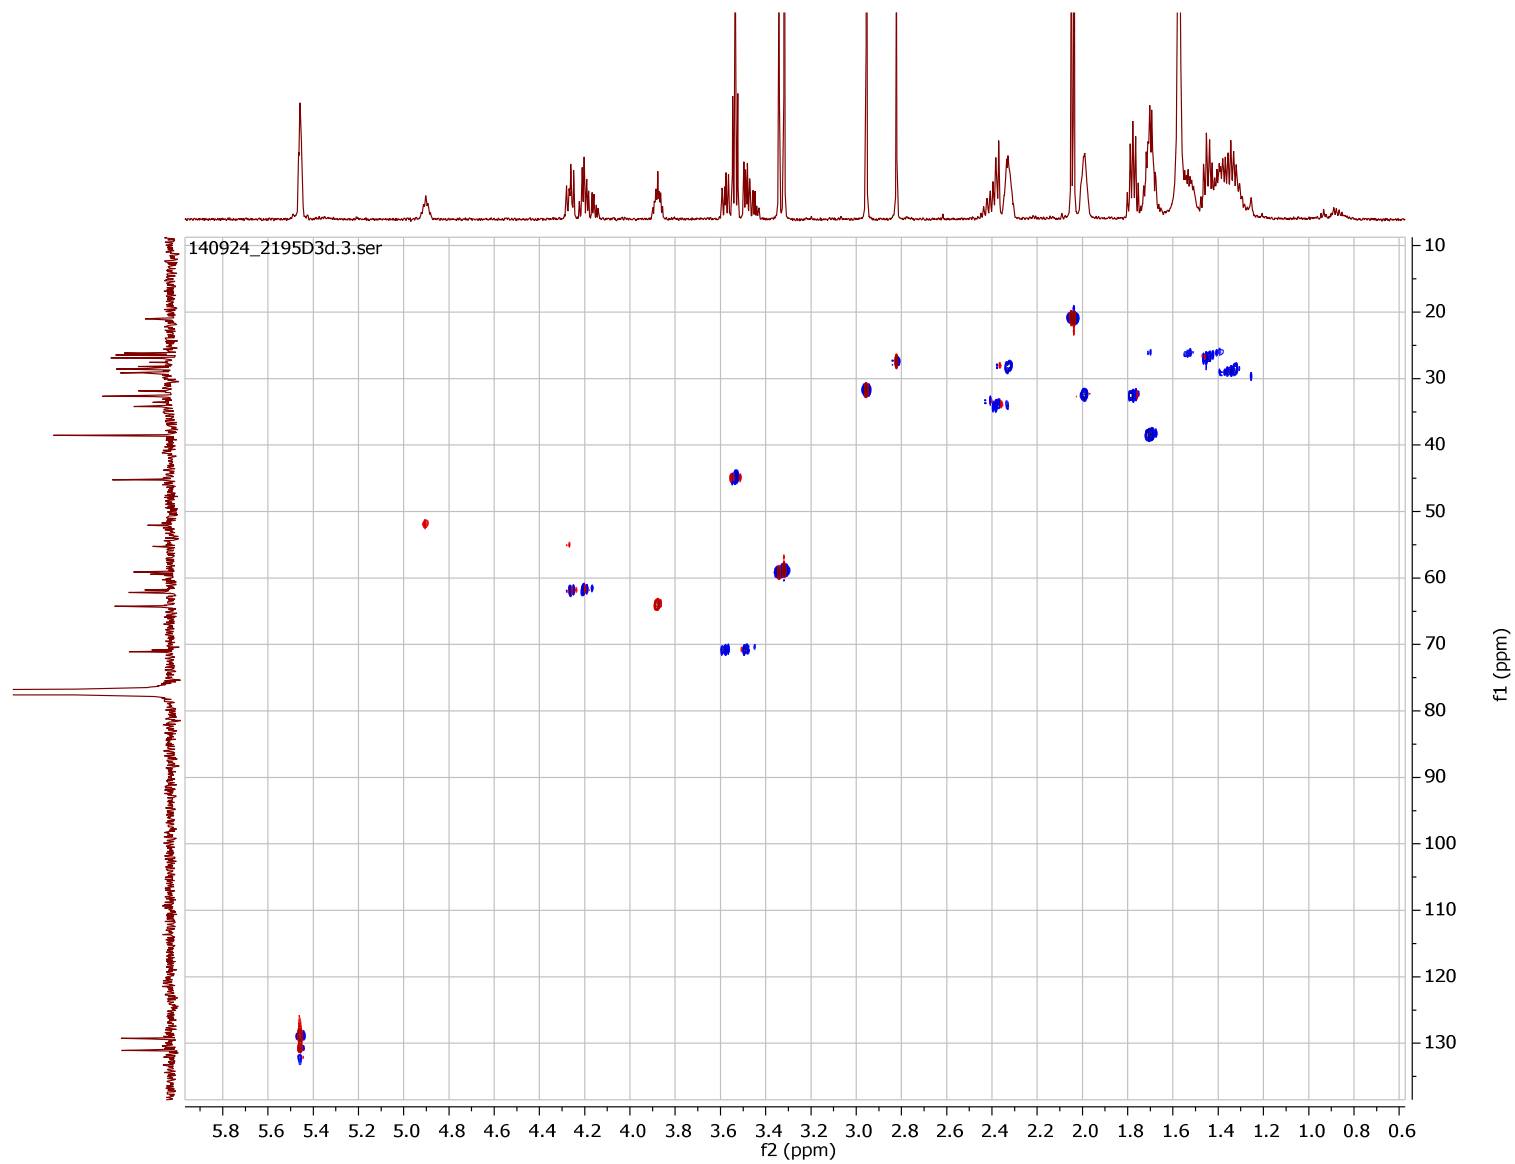

Figure S 5: HSQC ( $^1\text{H}$  600 MHz,  $\text{CDCl}_3$ ) spectrum of columbamide A.

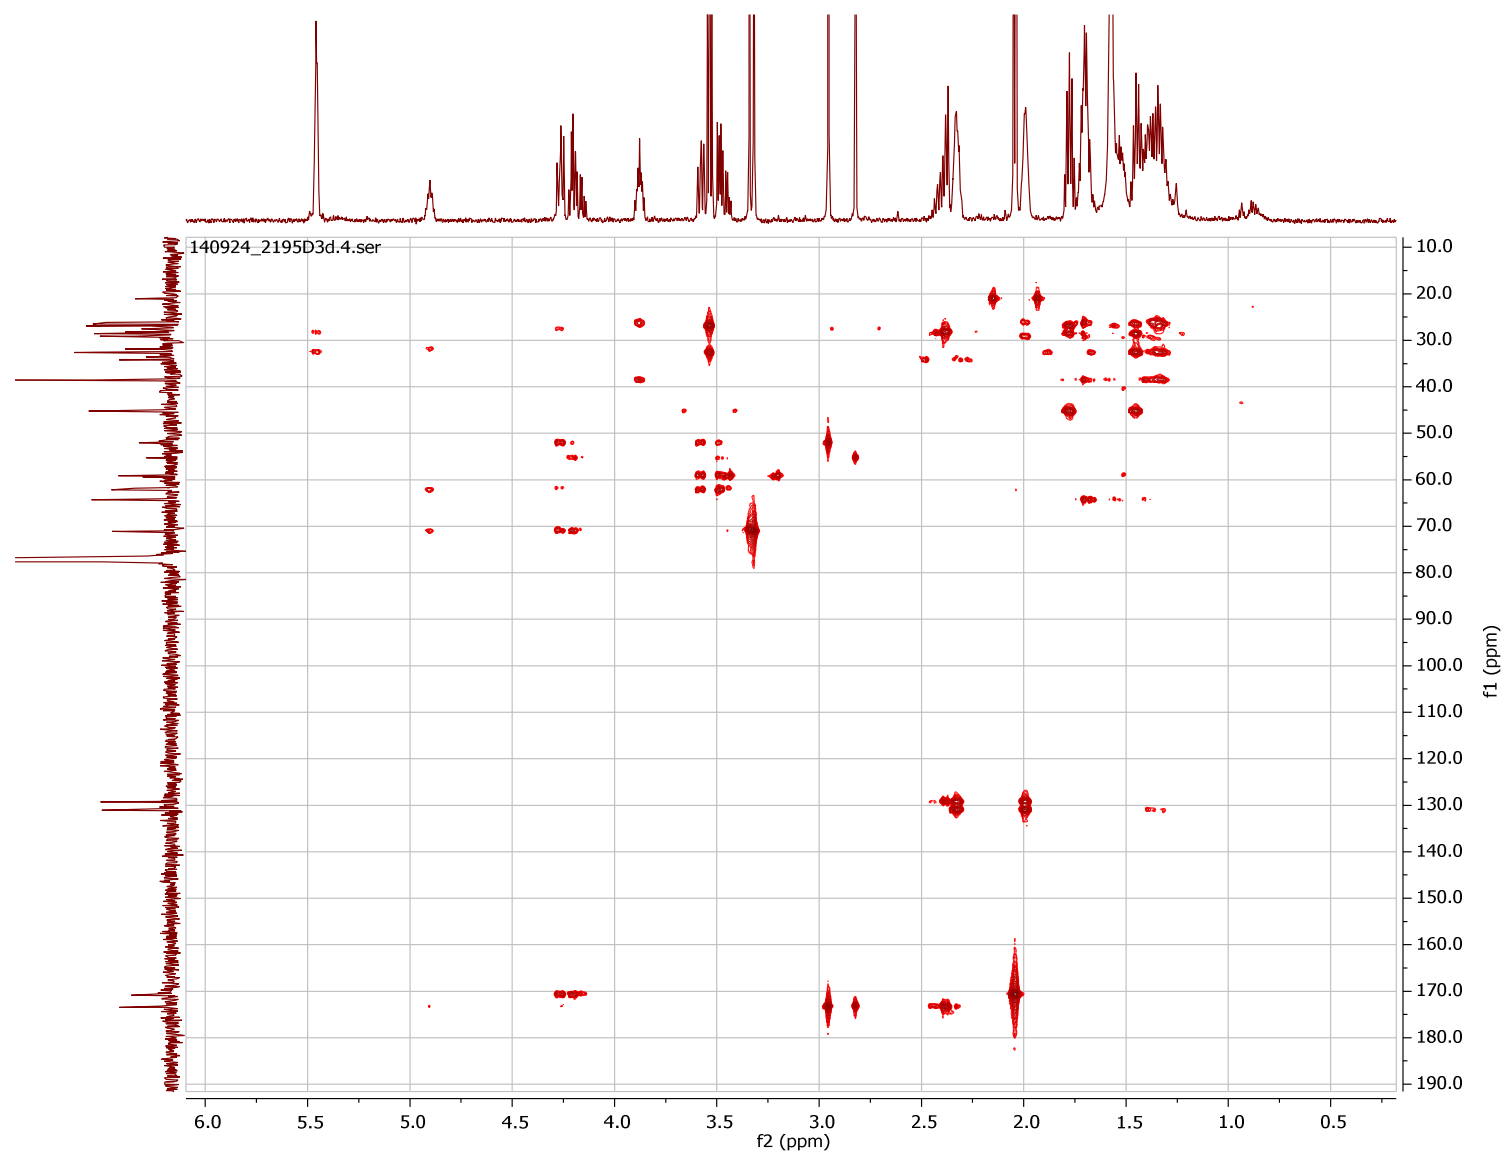

Figure S 6: HMBC ( $^1\text{H}$  600 MHz,  $\text{CDCl}_3$ ) spectrum of columbamide A.

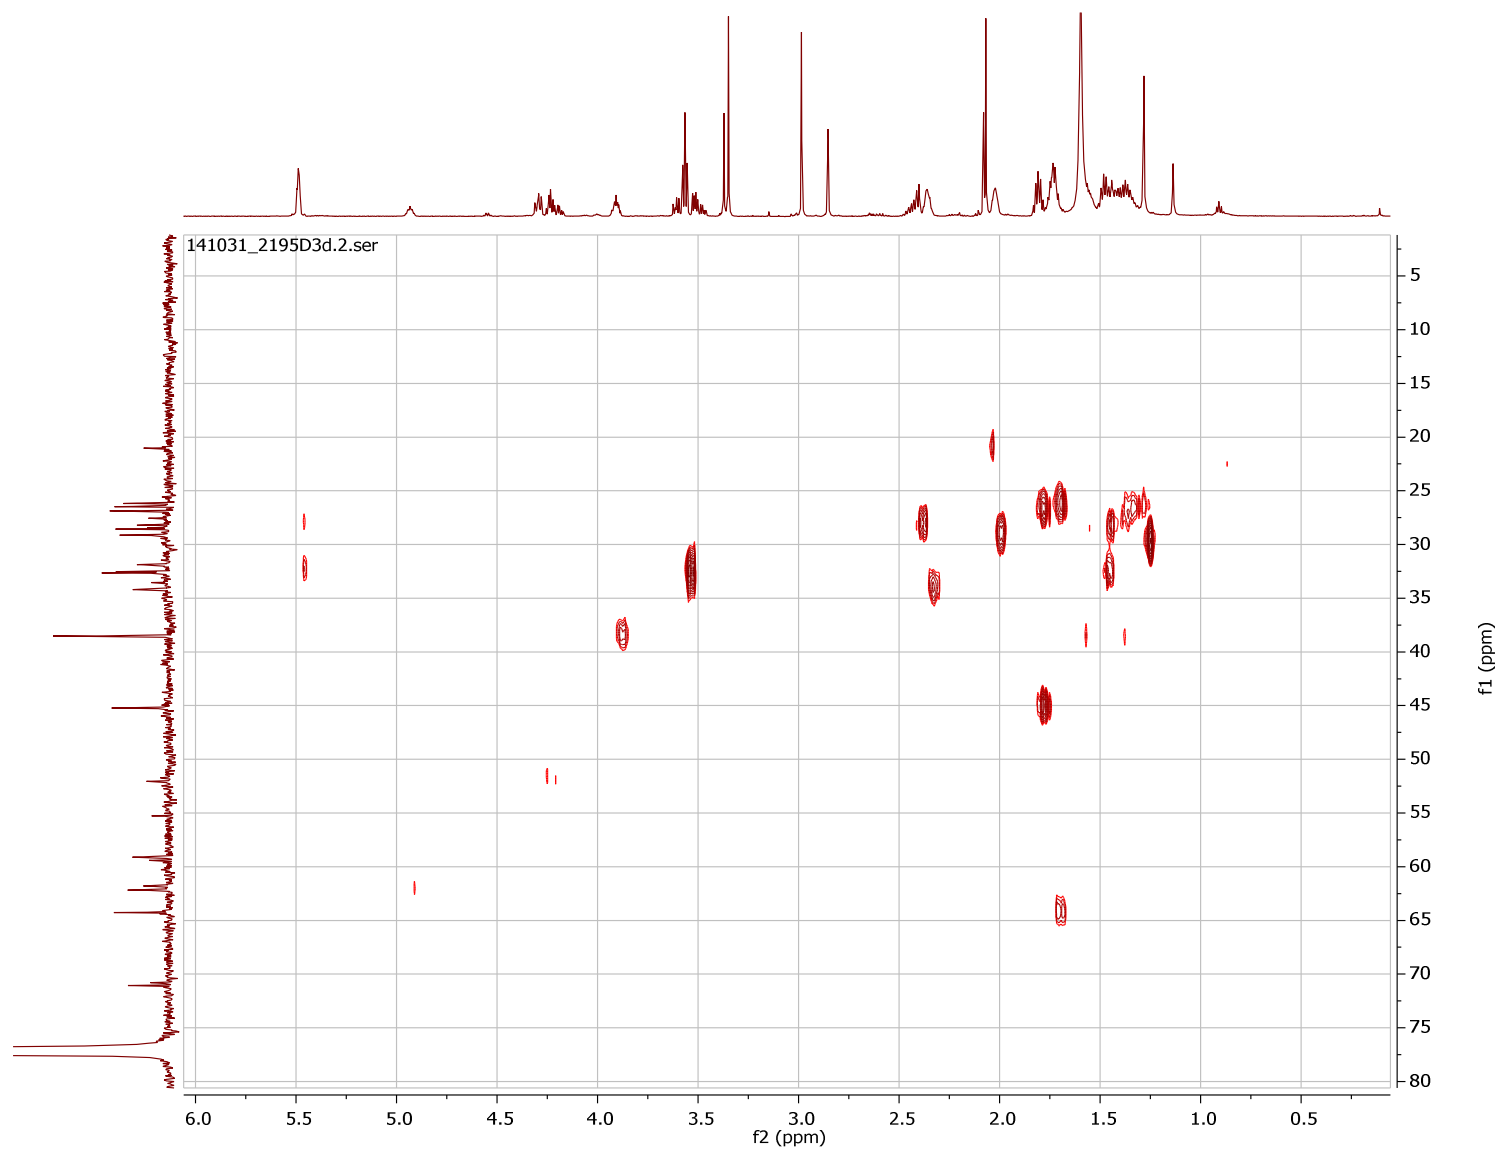

Figure S 7: H2BC ( $^1\text{H}$  600 MHz,  $\text{CDCl}_3$ ) spectrum of columbamide A

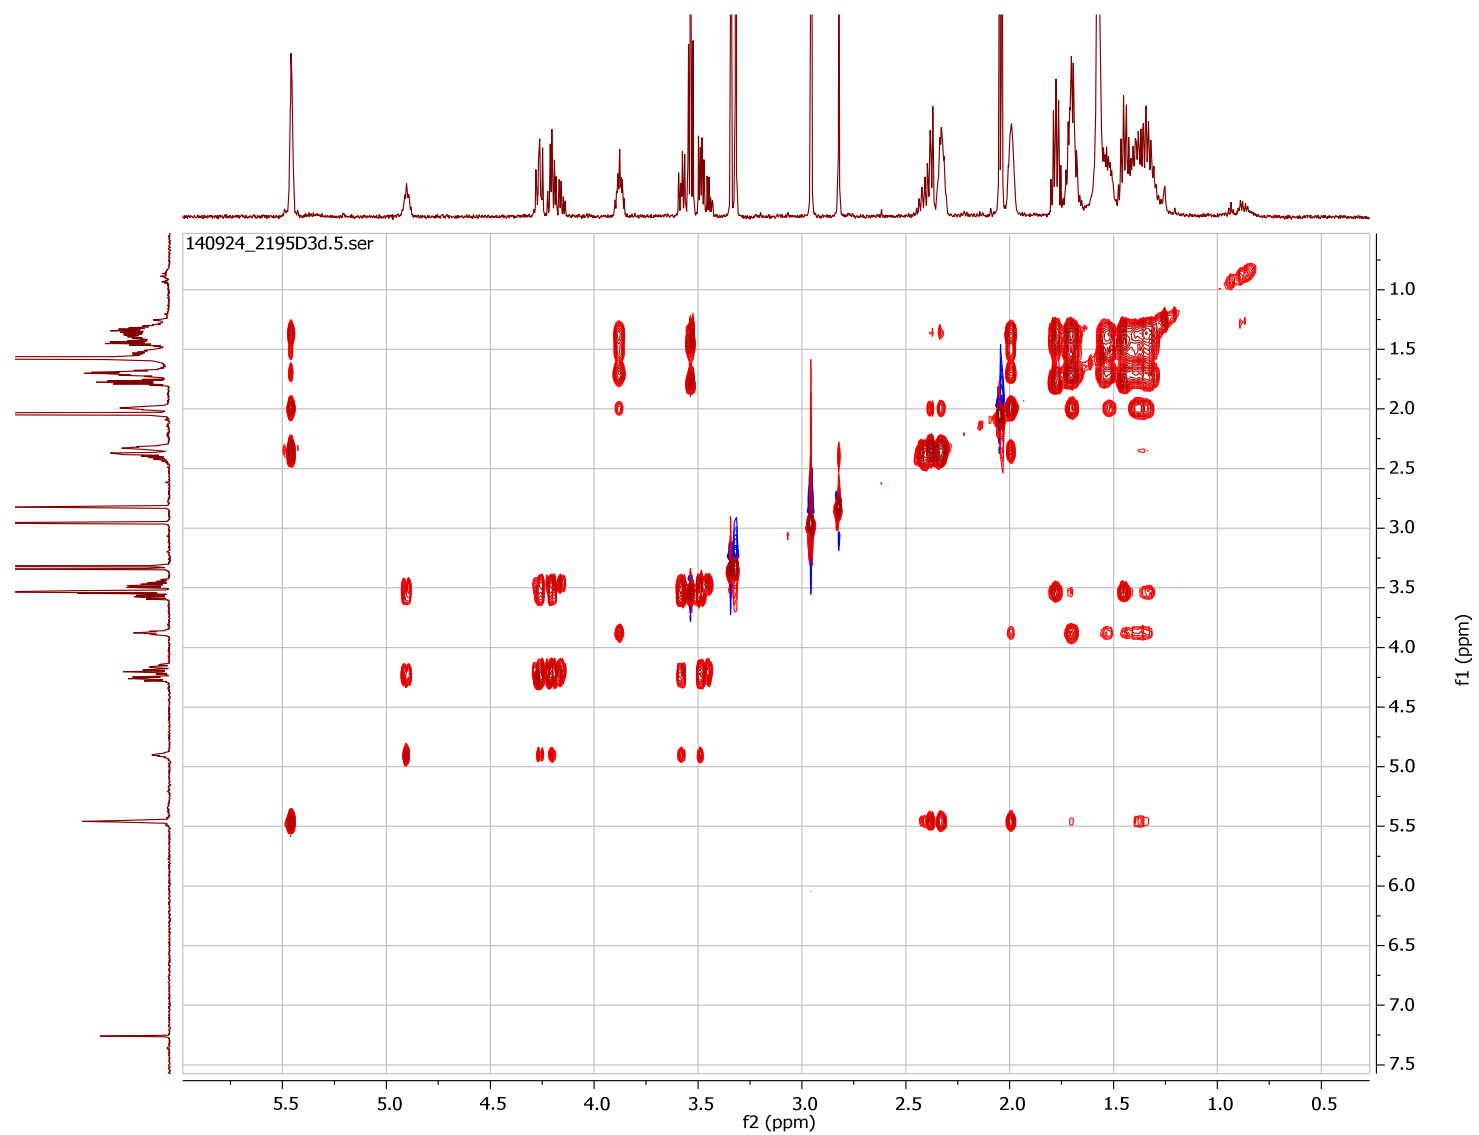

Figure S 8: TOCSY ( $^1\text{H}$  600 MHz,  $\text{CDCl}_3$ ) spectrum of columbamide A.

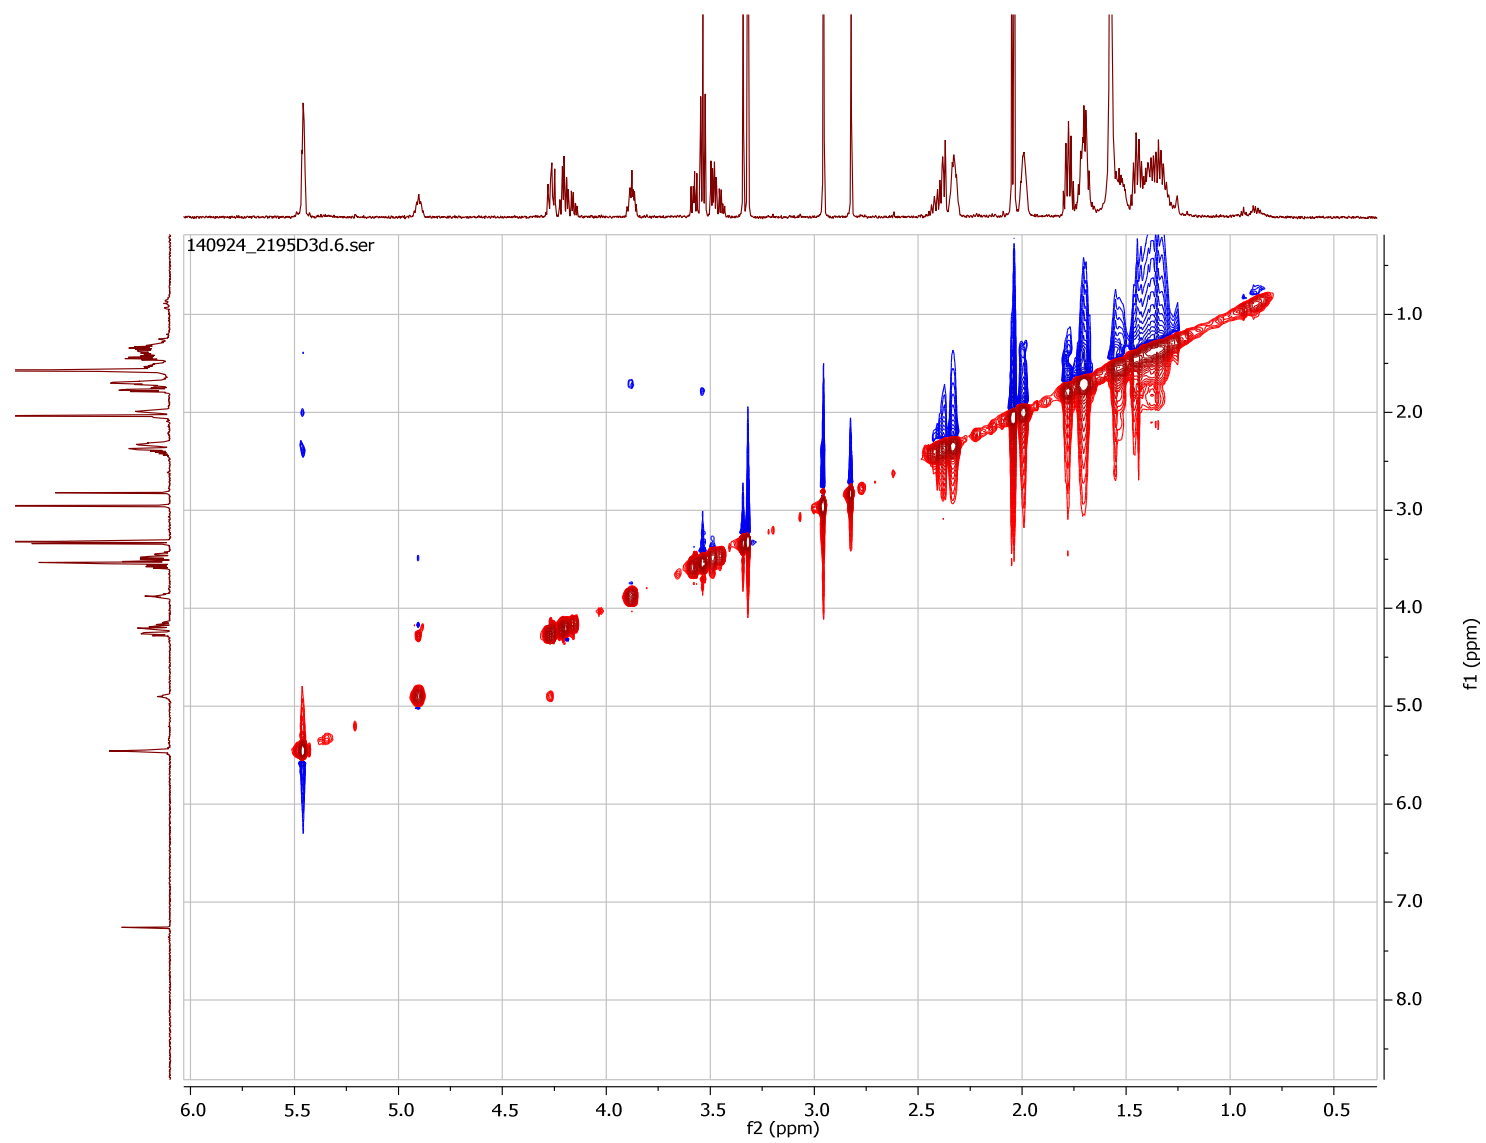

Figure S 9: NOESY ( $^1\text{H}$  600 MHz,  $\text{CDCl}_3$ ) spectrum of columbamide A.

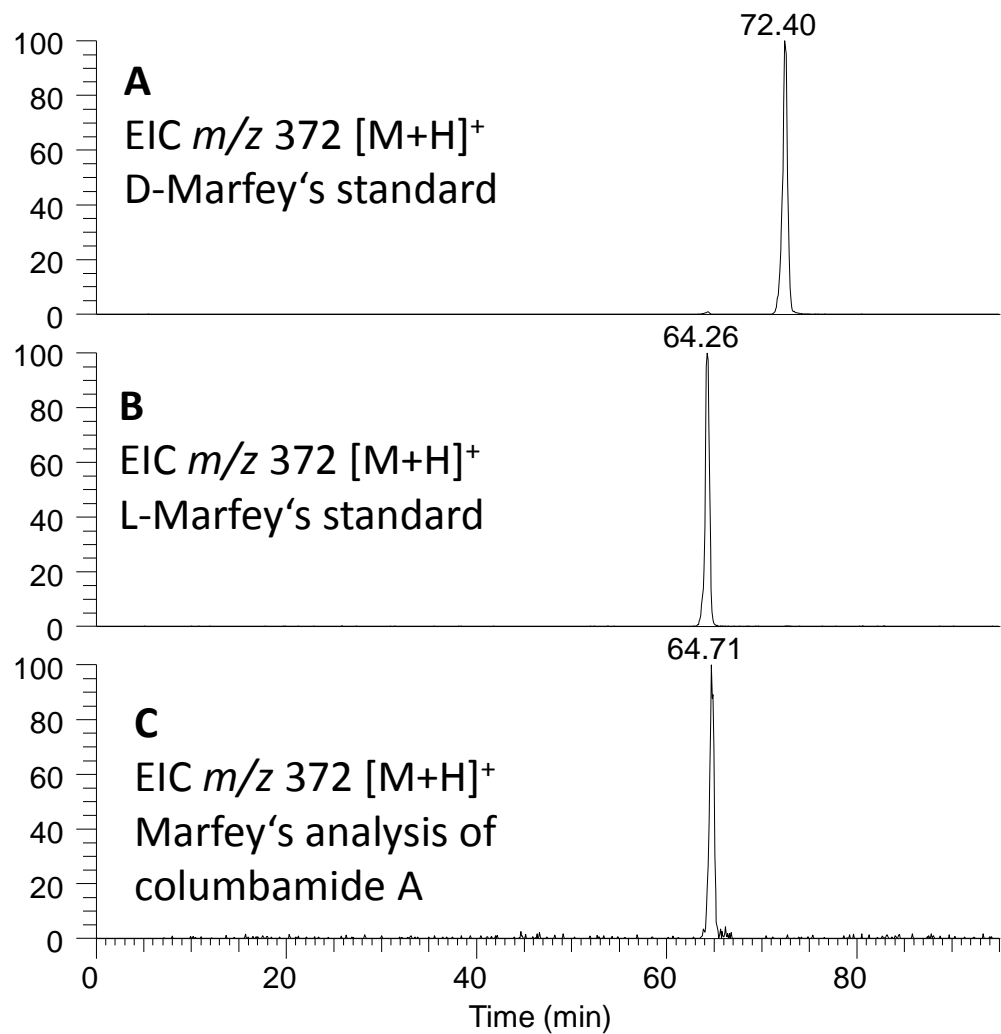

Figure S 10: Marfey's analysis of the dimethylated-serinol in columbamide A. **A** shows the extracted ion chromatogram of the D-Marfey's standard and **B** shows the L-Marfey's standard. **C** depicts the extracted ion chromatogram of hydrolyzed and Marfey's derivatized columbamide A.

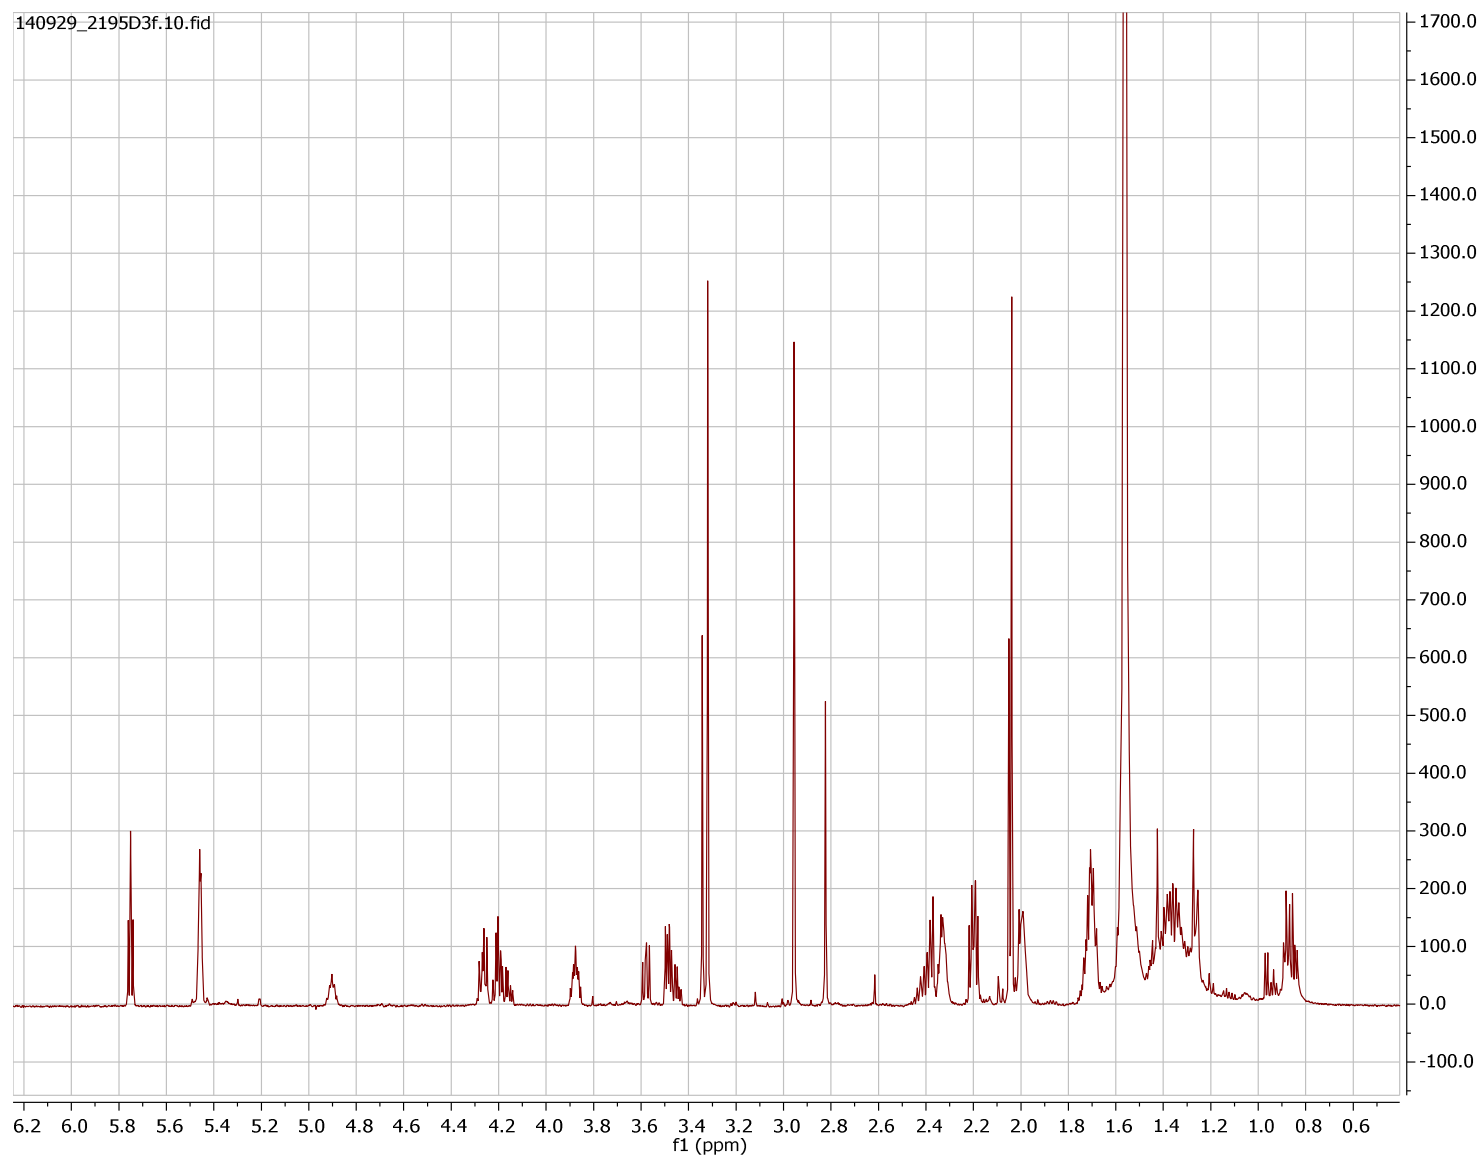

Figure S 11:  $^1\text{H}$  NMR (600 MHz,  $\text{CDCl}_3$ ) spectrum of columbamide B.



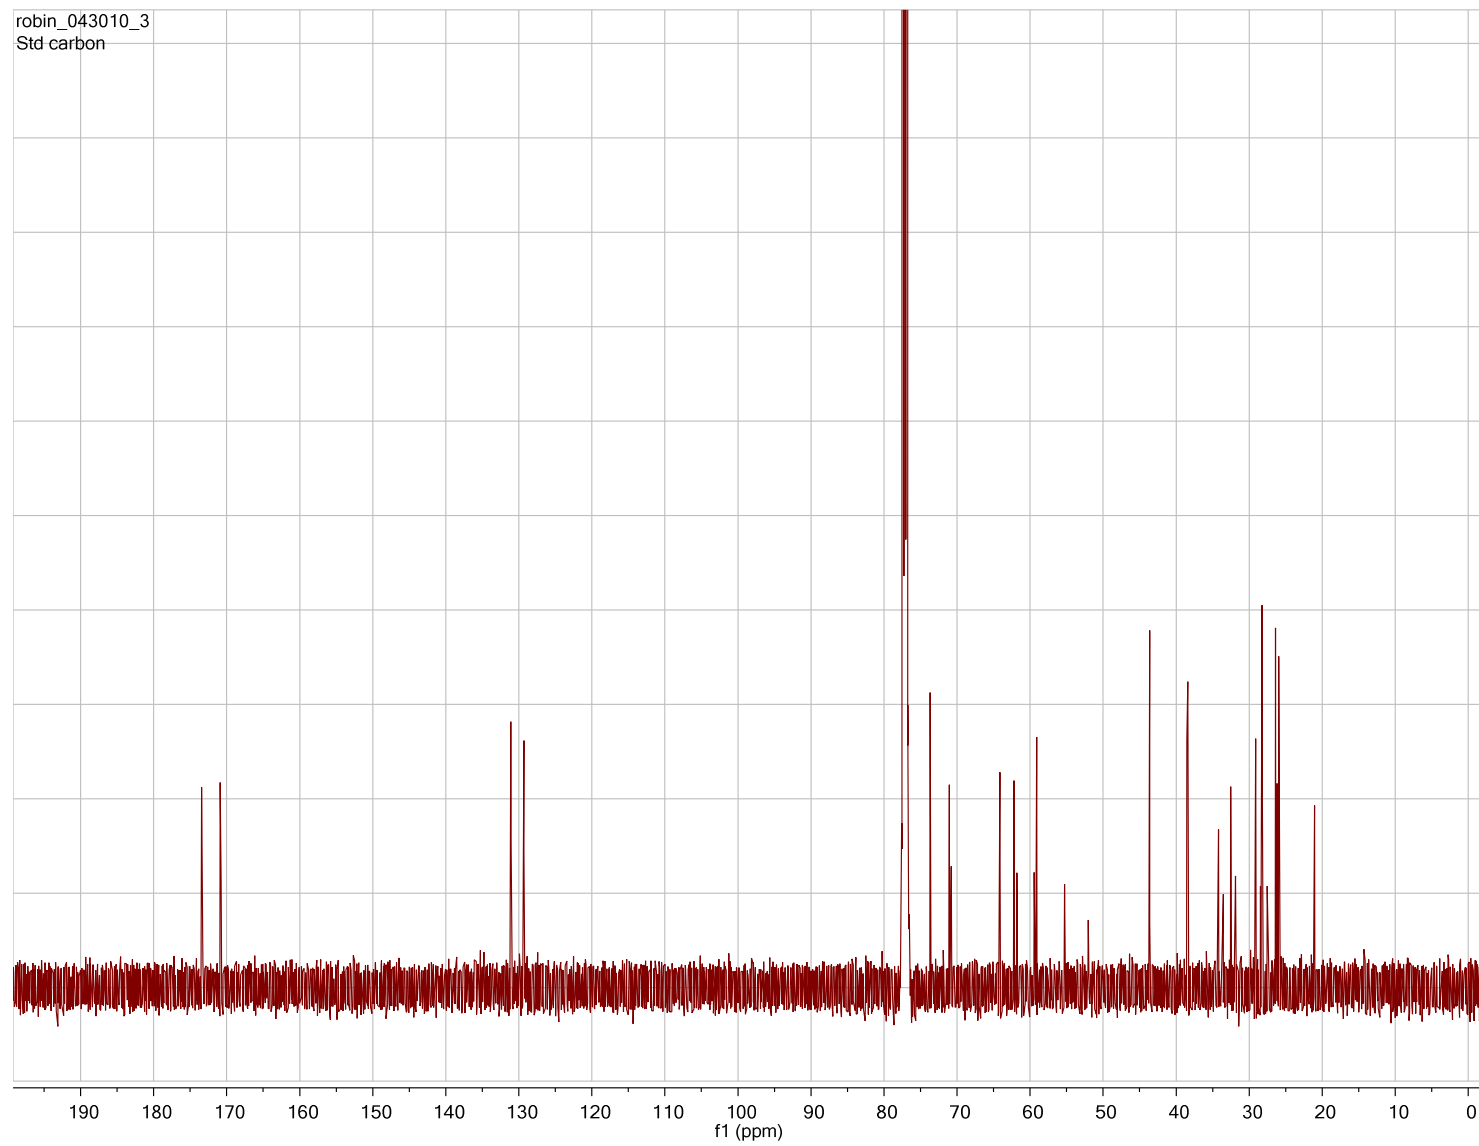

Figure S 12:  $^{13}\text{C}$  NMR (125 MHz,  $\text{CDCl}_3$ ) spectrum of columbamide B.

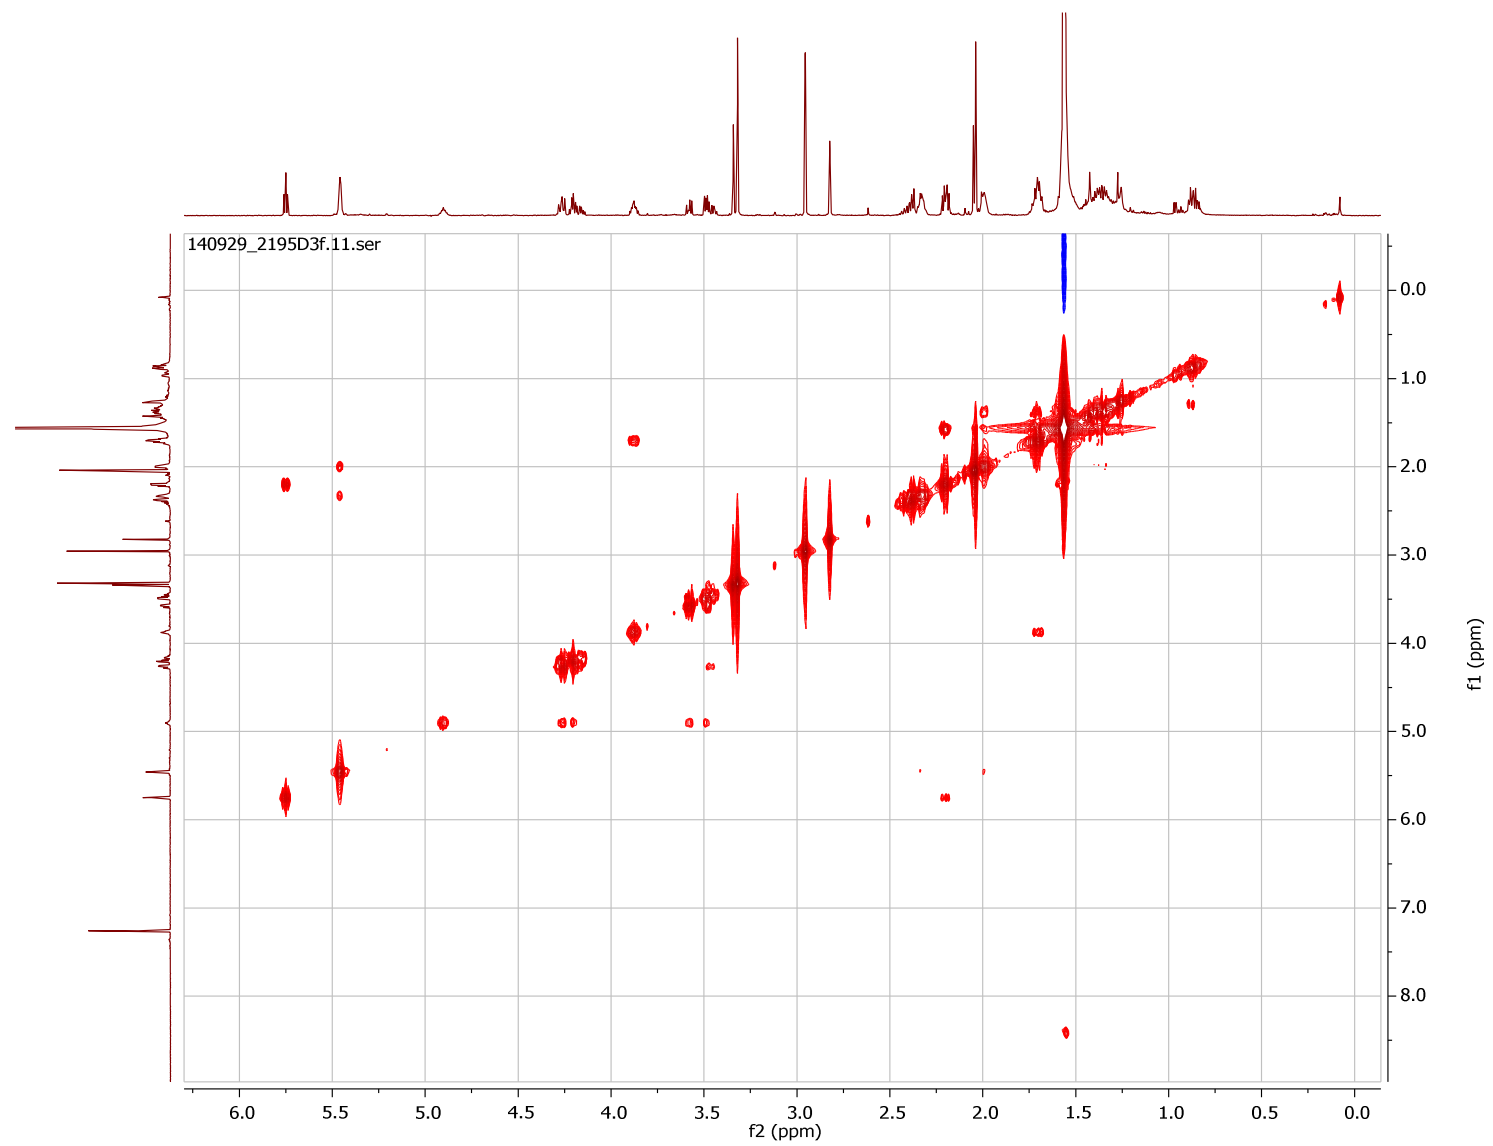

Figure S 13: COSY ( $^1\text{H}$  600 MHz,  $\text{CDCl}_3$ ) spectrum of columbamide B.

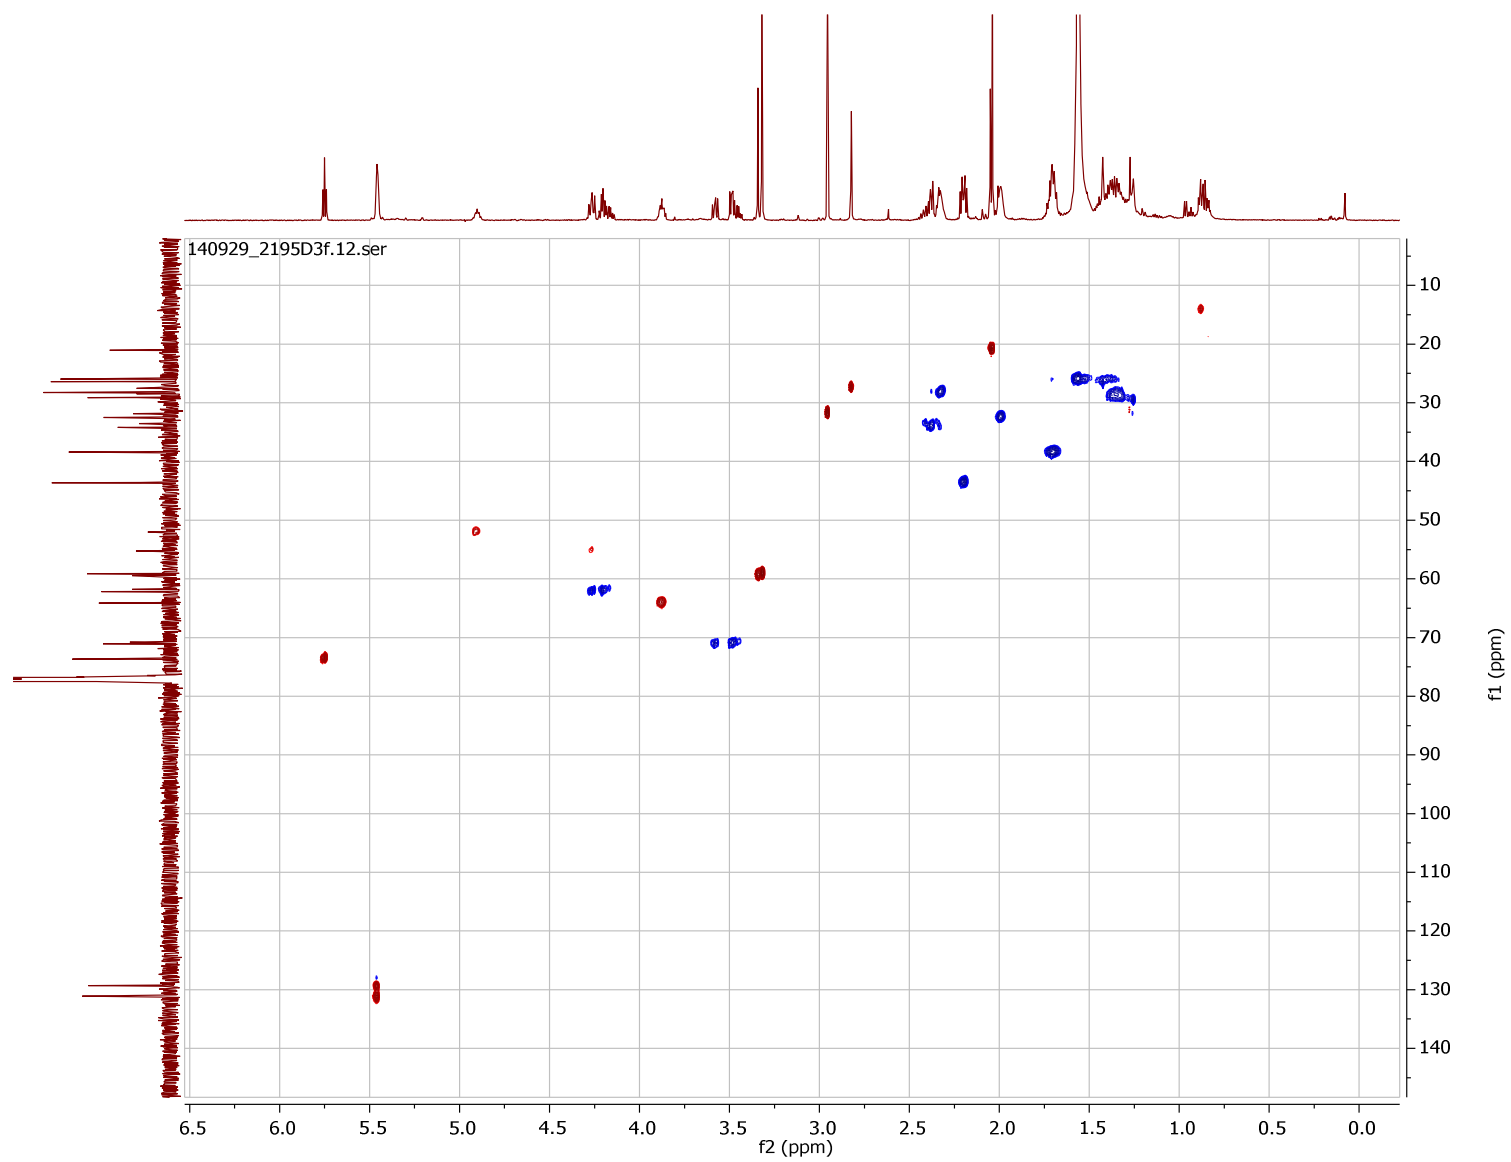

Figure S 14: HSQC ( $^1\text{H}$  600 MHz,  $\text{CDCl}_3$ ) spectrum of columbamide B.

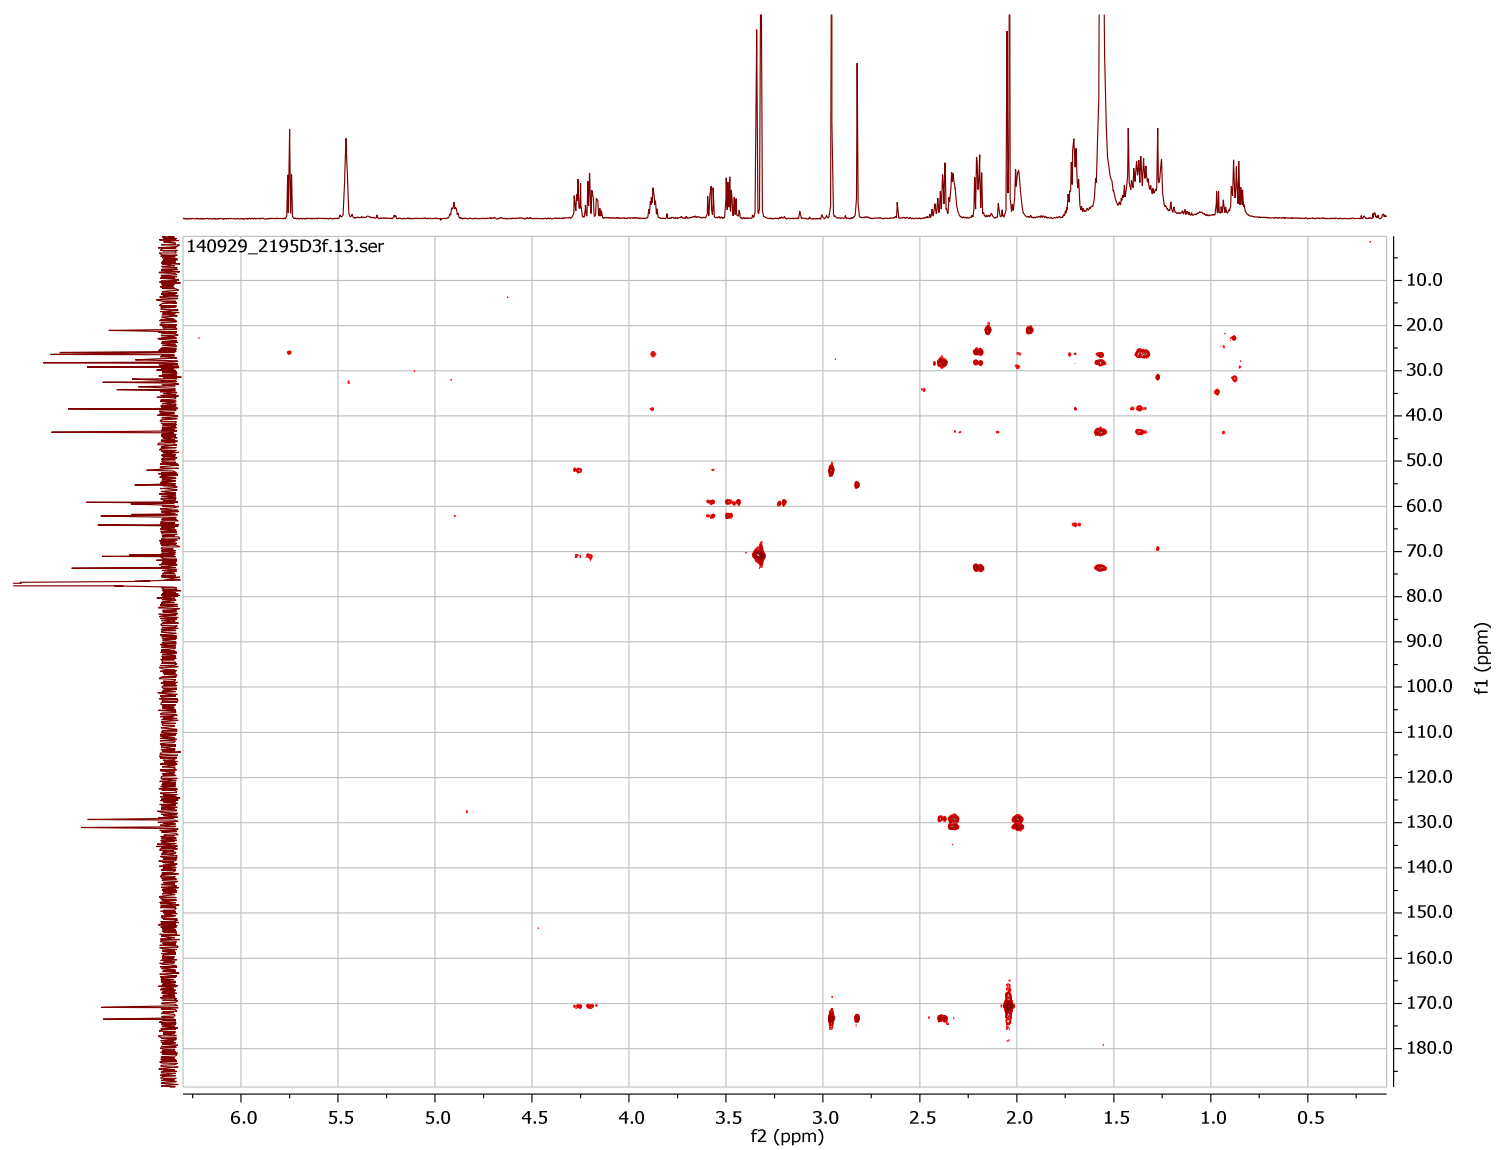

Figure S 15: HMBC ( $^1\text{H}$  600 MHz,  $\text{CDCl}_3$ ) spectrum of columbamide B.

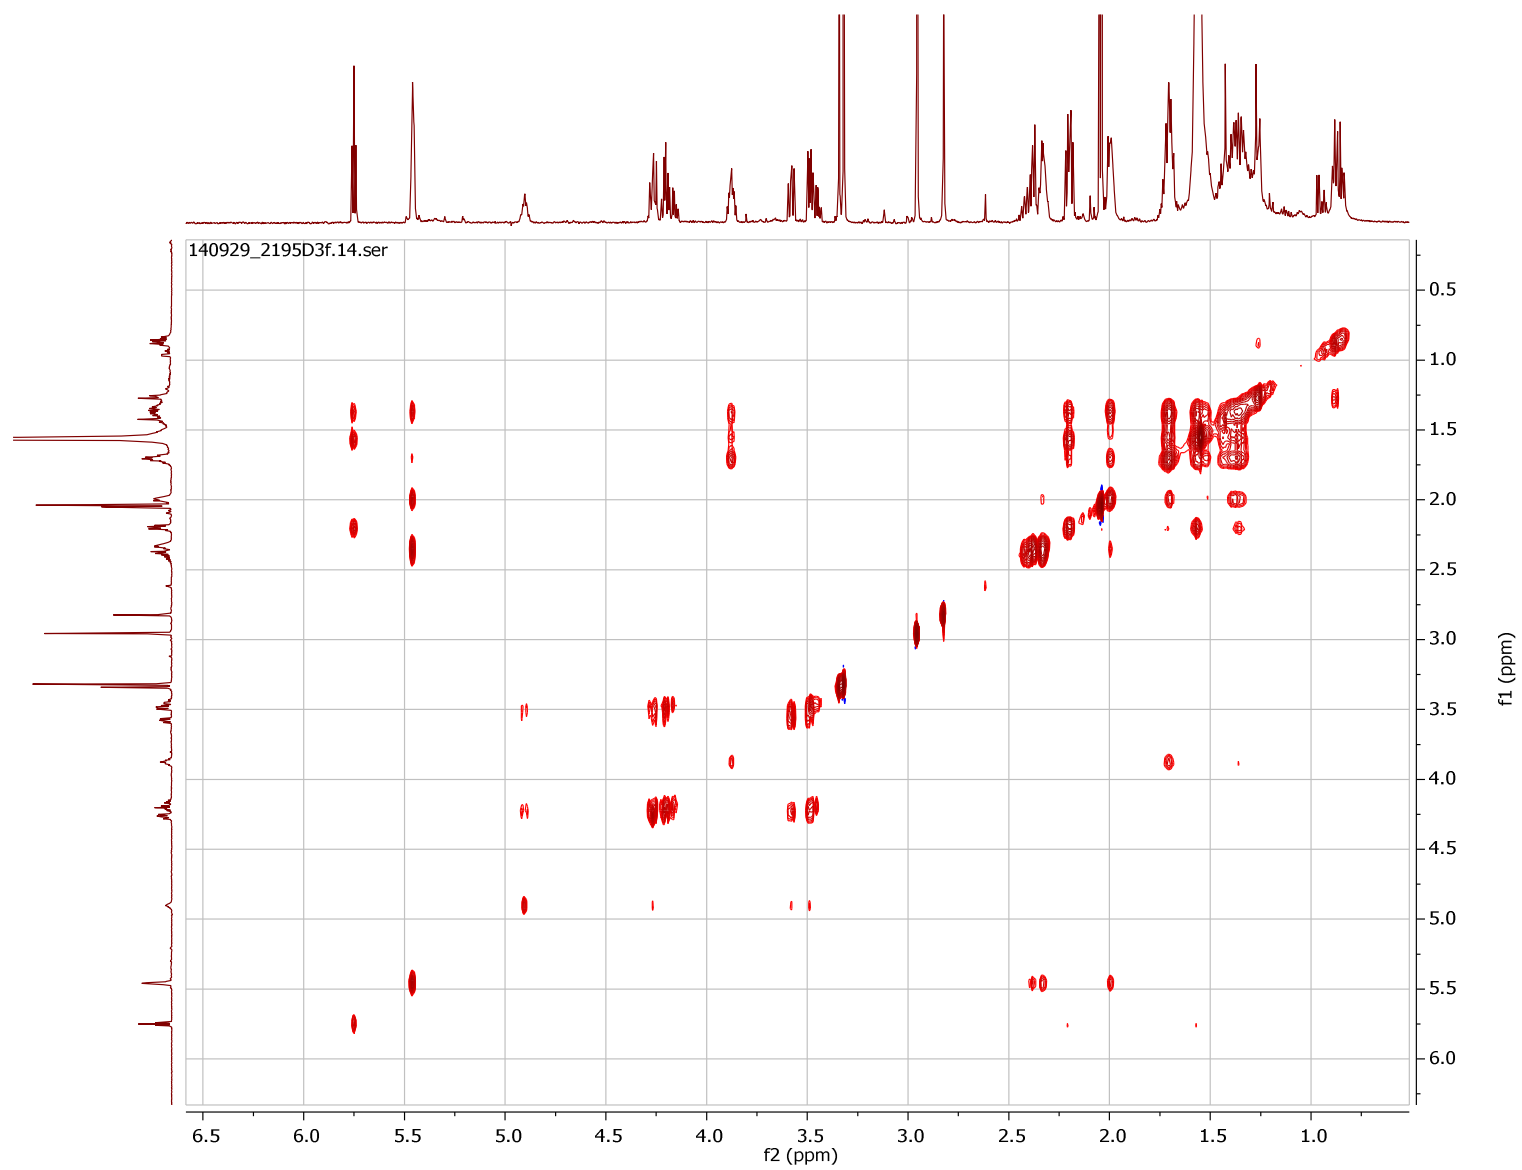

Figure S 16: TOCSY ( $^1\text{H}$  600 MHz,  $\text{CDCl}_3$ ) spectrum of columbamide B.

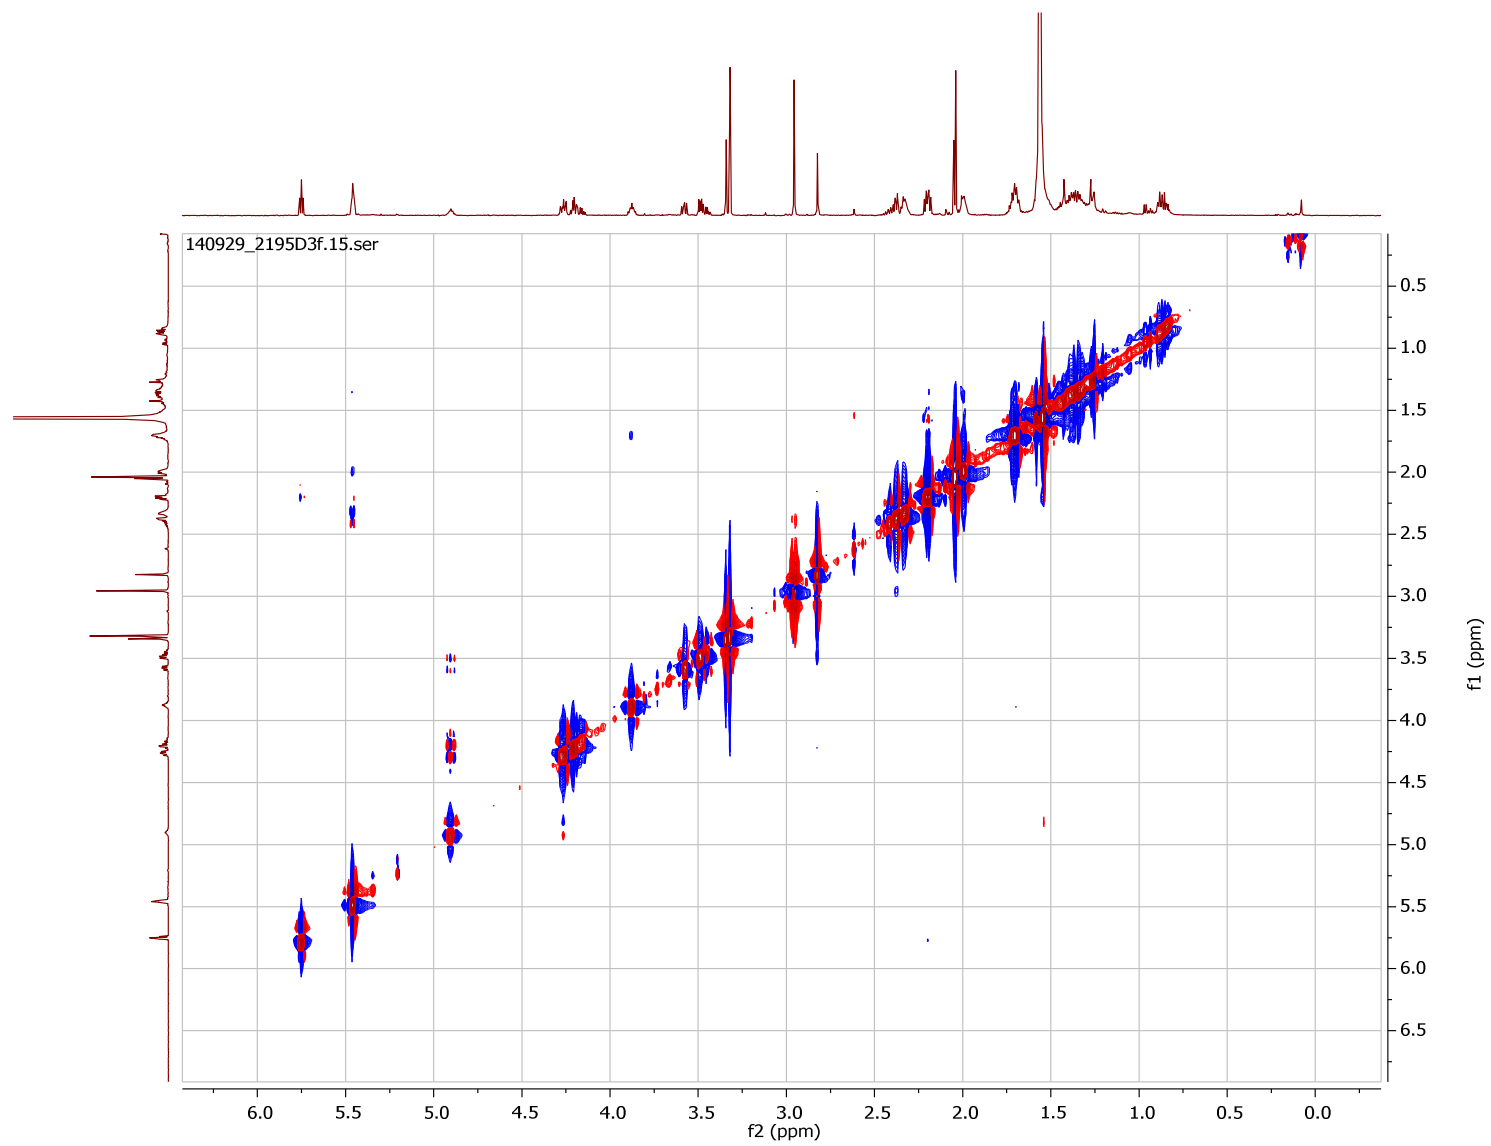

Figure S 17: NOESY ( $^1\text{H}$  600 MHz,  $\text{CDCl}_3$ ) spectrum of columbamide B.

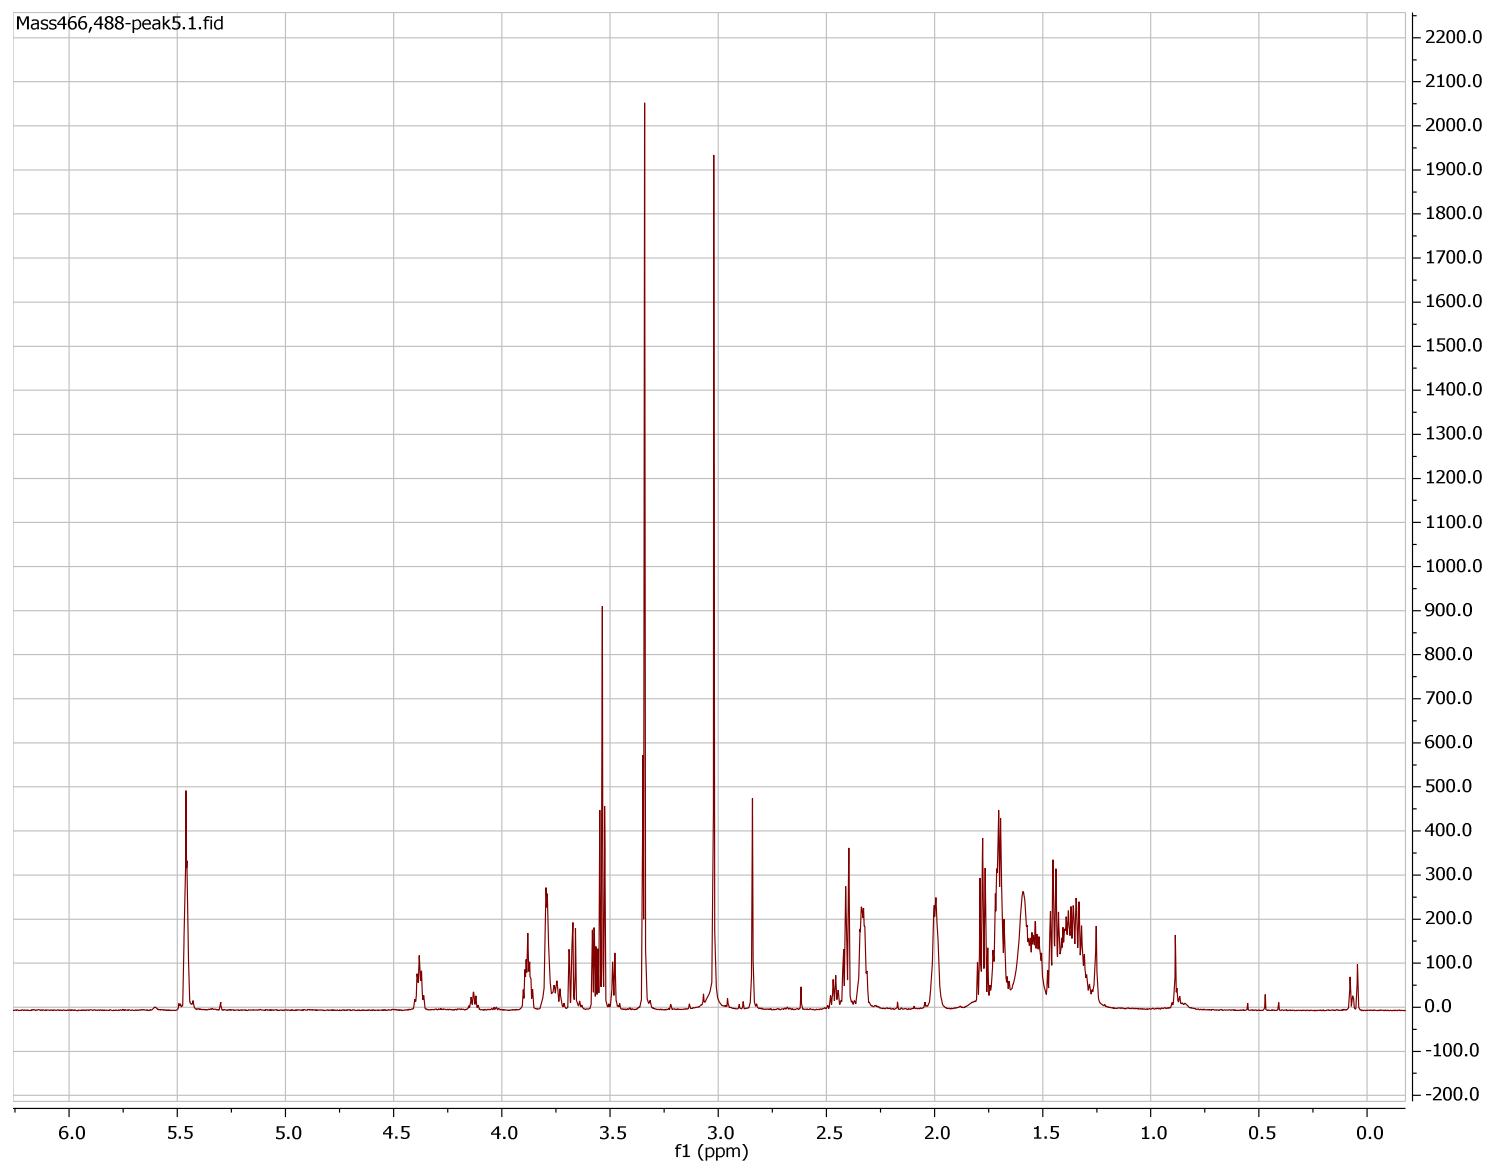

Figure S 18:  $^1\text{H}$  NMR (600 MHz,  $\text{CDCl}_3$ ) spectrum of columbamide C.

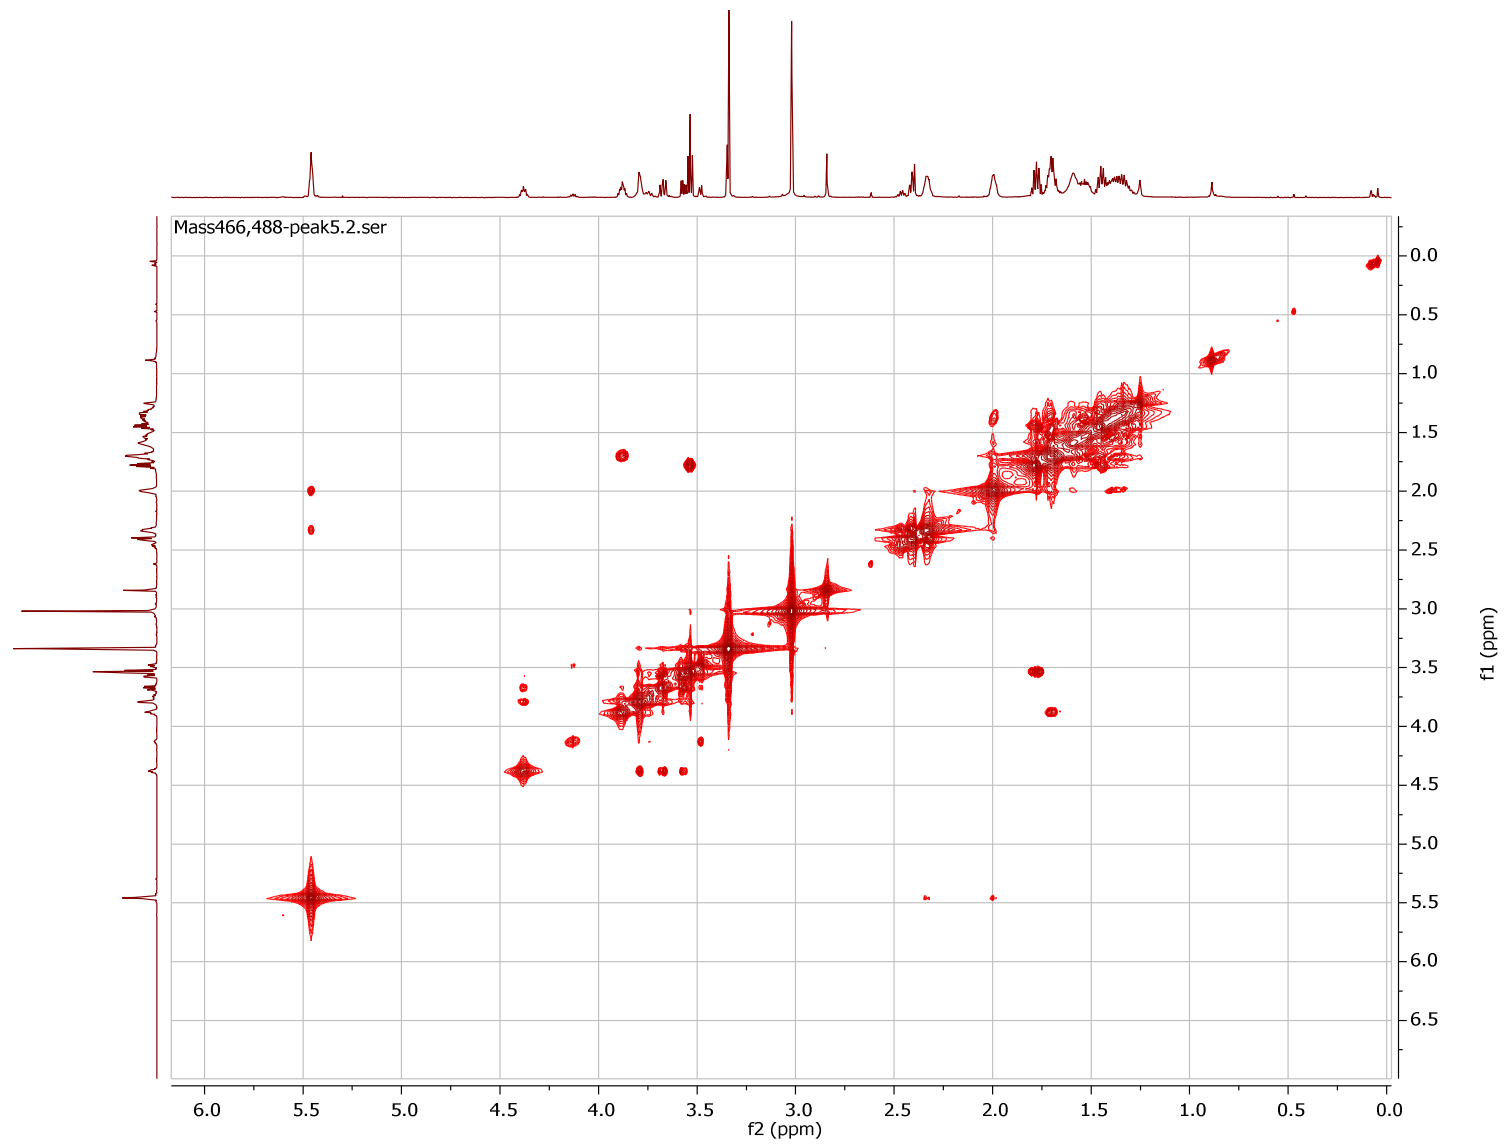

Figure S 19: COSY ( $^1\text{H}$  600 MHz,  $\text{CDCl}_3$ ) spectrum of columbamide C.



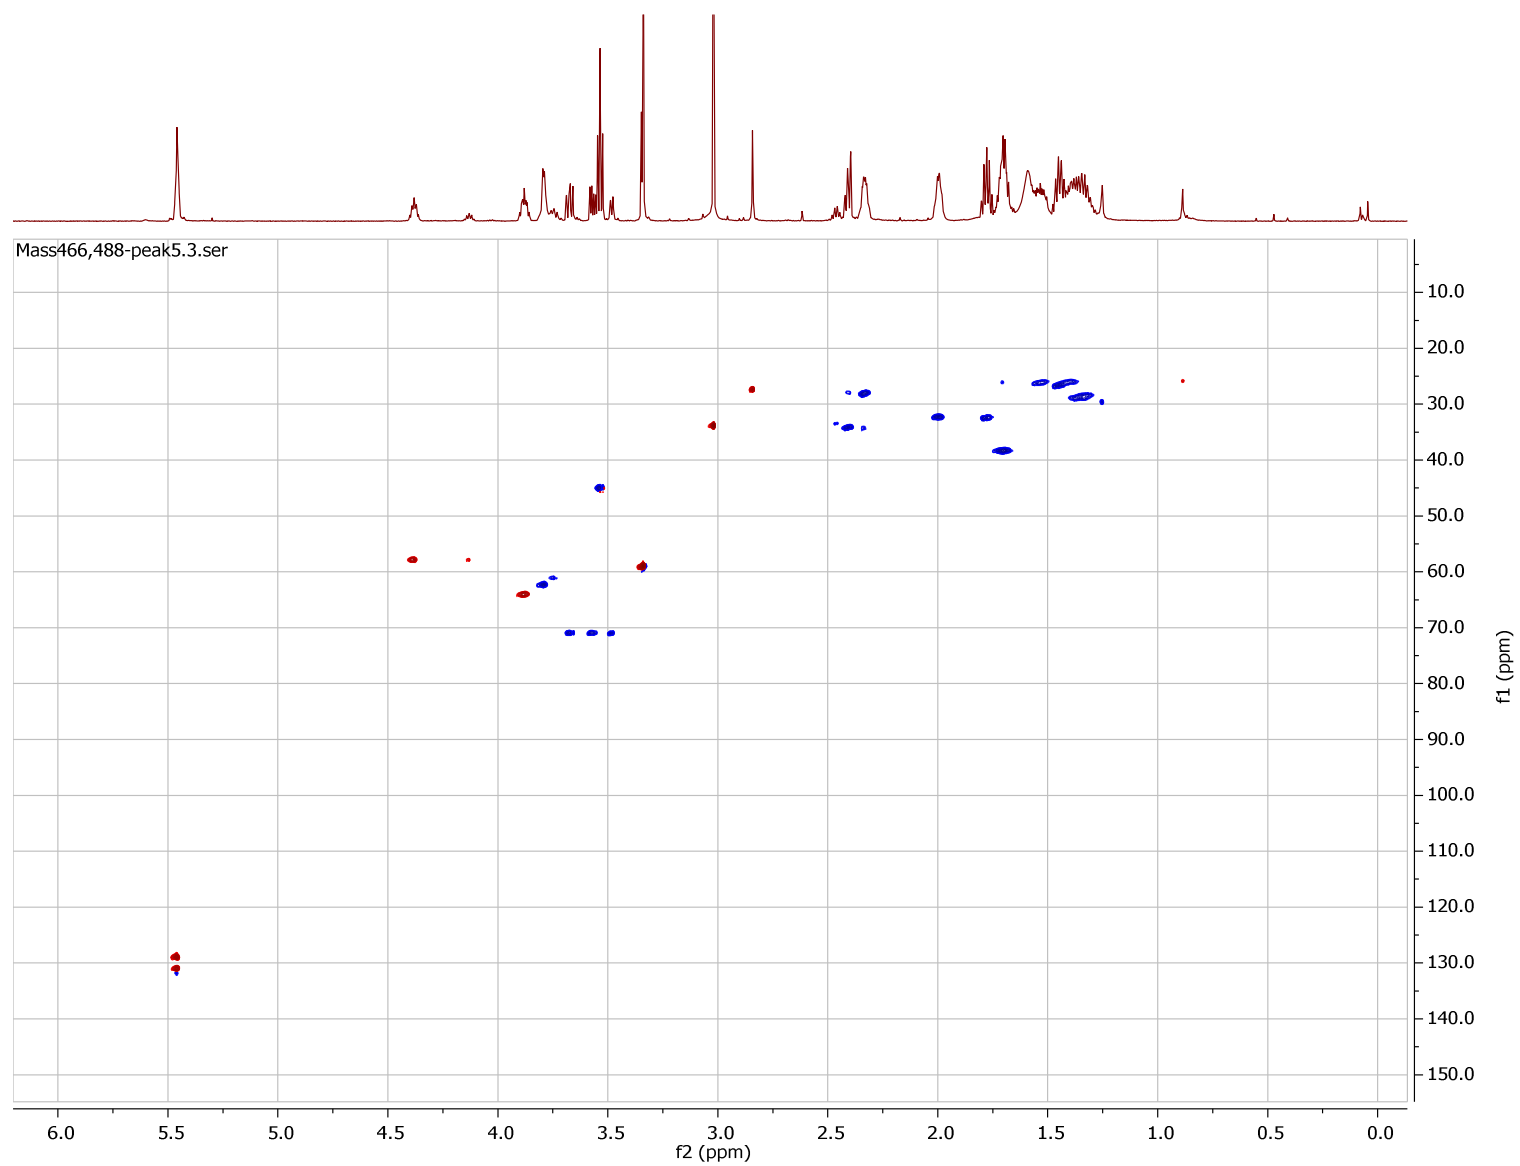

Figure S 20: HSQC ( $^1\text{H}$  600 MHz,  $\text{CDCl}_3$ ) spectrum of columbamide C.

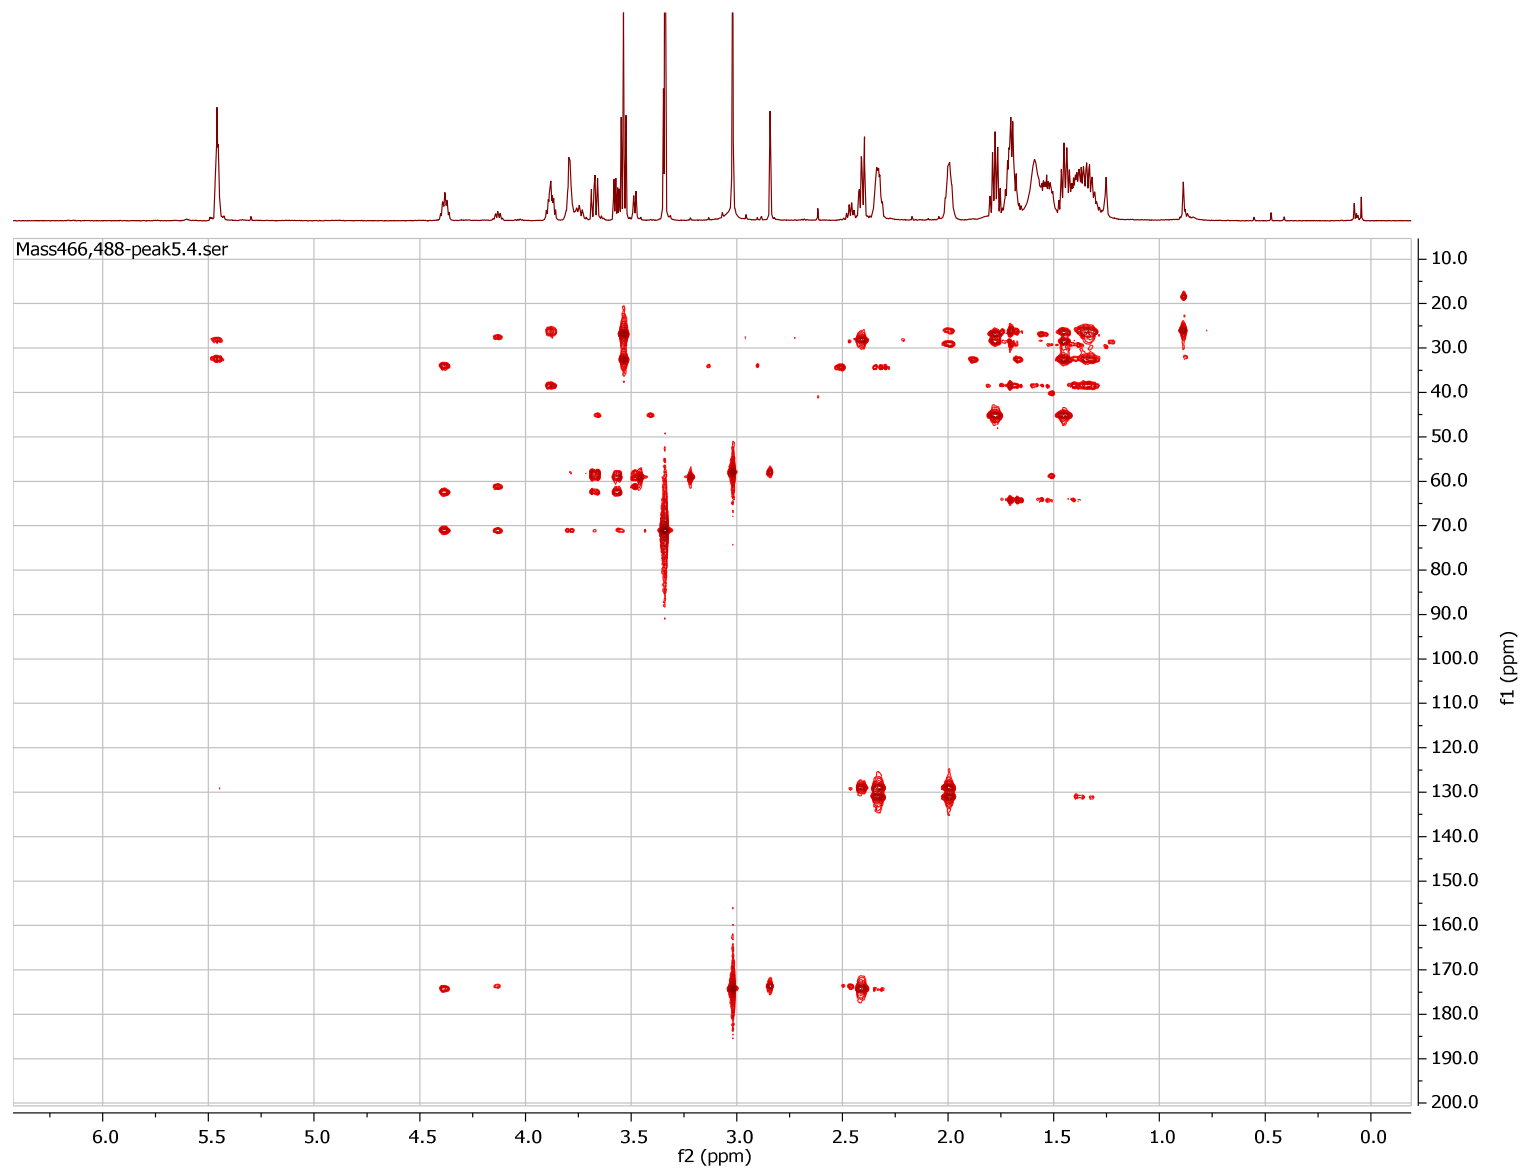

Figure S 21: HMBC ( $^1\text{H}$  600 MHz,  $\text{CDCl}_3$ ) spectrum of columbamide C.

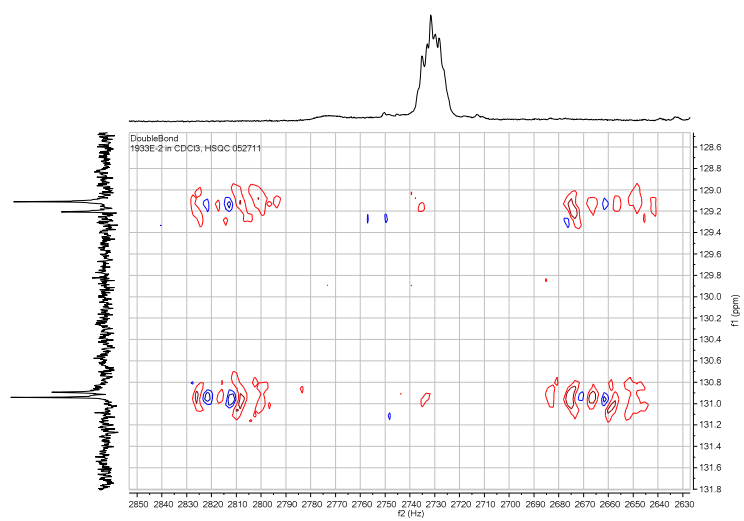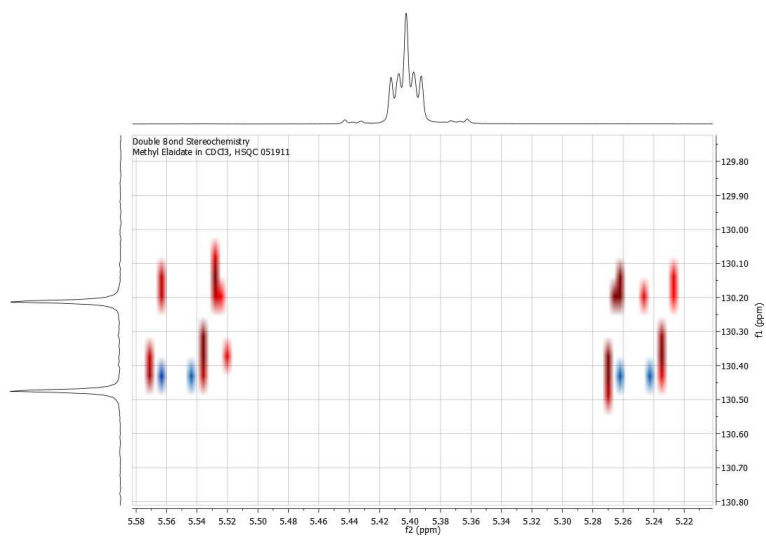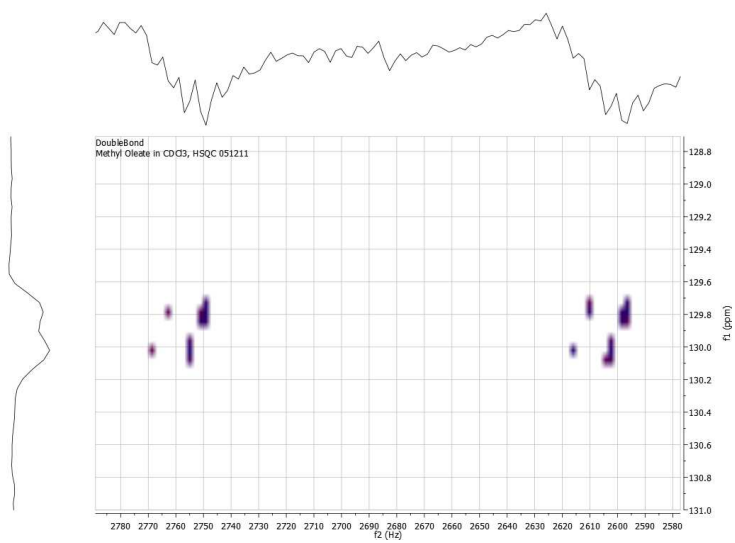

Figure S 22: Measurement of the coupling constant using HSQC and measuring the  $^3J_{HH}$  coupling constant from the  $^{13}C$  satellites of columbamide A, methyl elaidate and methyl oleate.

- [1] G. L. Challis, J. Ravel, C. A. Townsend, *Chemistry & Biology* **2000**, 7, 211.
- [2] M. Z. Ansari, J. Sharma, R. S. Gokhale, D. Mohanty, *BMC Bioinformatics* **2008**, 9, 454.
